1 **Parkin coordinates mitochondrial lipid remodeling to execute mitophagy**

2

3 Chao-Chieh Lin<sup>1, 3, 7</sup>, Jin Yan<sup>1,7</sup>, Meghan D. Kapur<sup>1,7</sup>, Kristi L. Norris<sup>1,7</sup>, Cheng-Wei Hsieh<sup>4</sup>,  
4 Chun-Hsiang Lai<sup>1</sup>, Nicolas Vitale<sup>5</sup>, Kah-Leong Lim<sup>6</sup>, Ziqiang Guan<sup>2</sup>, Jen-Tsan Chi<sup>3</sup>, Wei-Yuan  
5 Yang<sup>4</sup> and Tso-Pang Yao<sup>1#</sup>

6 Duke University Medical Center, Durham, NC, USA

7 <sup>1</sup>. Department of Pharmacology and Cancer Biology,

8 <sup>2</sup>. Department of Biochemistry,

9 <sup>3</sup>. Department of Molecular Genetics and Microbiology,

10 <sup>4</sup>. Institute of Biological Chemistry, Academia Sinica, Taipei 115, Taiwan

11 <sup>5</sup>. Institut des Neurosciences Cellulaires et Intégratives UPR-3212 CNRS - Université de

12 Strasbourg

13 <sup>6</sup>. Lee Kong Chian School of Medicine, Singapore

14 <sup>7</sup>. These authors contribute equally to this work.

15 #Correspondence: [yao00001@mc.duke.edu](mailto:yao00001@mc.duke.edu)

16 Running Title: Mitochondrial lipid remodeling controls mitophagy

17 Key words: diacylglycerol, parkin, autophagy receptors, Golgi, Lipin-1, mitophagy

18

19 **Abstract**

20 Mitochondrial failure caused by Parkin mutations contributes to Parkinson's disease. Parkin  
21 binds, ubiquitinates, and targets impaired mitochondria for autophagic destruction. Robust  
22 mitophagy involves peri-nuclear concentration of Parkin-tagged mitochondria, followed by  
23 dissemination of juxtannuclear mitochondrial aggregates, and efficient sequestration of  
24 individualized mitochondria by autophagosomes. Here, we report that the execution of complex  
25 mitophagic events requires active mitochondrial lipid remodeling. Parkin recruits phospholipase  
26 D2 to the depolarized mitochondria and generate phosphatidic acid (PA). Mitochondrial PA is  
27 subsequently converted to diacylglycerol (DAG) by Lipin-1 phosphatase- a process that further  
28 requires mitochondrial ubiquitination and ubiquitin-binding autophagic receptors, NDP52 and  
29 Optineurin. We show that Optineurin transports, via Golgi-derived vesicles, a PA-binding factor  
30 EndoB1 to ubiquitinated mitochondria, thereby facilitating DAG production. Mitochondrial  
31 DAG activates both F-actin assembly to drive mitochondrial individualization, and  
32 autophagosome biogenesis to efficiently restrict impaired mitochondria. Thus Parkin, autophagic  
33 receptors and the Golgi complex orchestrate mitochondrial lipid remodeling to execute robust  
34 mitophagy.

35

36

37

38

39

## 40 **Introduction**

41           Mutations in the ubiquitin E3 ligase, Parkin (PARK2), are the most common cause of  
42 early onset Parkinson's disease (AR-JP) <sup>1</sup>. Genetic and biochemical evidence have shown that  
43 Parkin, working in conjunction with the mitochondrial kinase, PINK1 (PARK6), preserves a  
44 healthy mitochondrial population<sup>2, 3, 4</sup>. Parkin and PINK1 maintain mitochondrial integrity, at  
45 least in part, by recognizing and targeting the impaired and de-energized mitochondria to  
46 autophagy- a double membrane vesicles that deliver mitochondria to lysosomes- for destruction <sup>5</sup>.  
47 <sup>6</sup>. In a basic model, stabilized PINK1 recruits Parkin to depolarized mitochondria, where Parkin  
48 catalyzes extensive ubiquitination to initiate mitophagy<sup>7, 8, 9</sup>. Mitochondrial ubiquitination serves  
49 at least two main functions: marking mitochondrial outer membrane proteins for proteasome-  
50 mediated degradation<sup>10, 11</sup>; recruiting autophagosomes to sequester and deliver ubiquitin-tagged  
51 mitochondria to lysosomes for degradation <sup>7, 12</sup>. While the exact contribution of the proteasome  
52 to mitophagy remains uncertain <sup>13</sup>, on the autophagy front, mitochondrial ubiquitination has been  
53 shown to recruit multiple ubiquitin-binding autophagic receptors, including Optineurin (OPTN),  
54 NDP52 and p62/SQSTM1<sup>12, 14, 15</sup>, which bring together ubiquitinated mitochondria and  
55 autophagosomes through their binding of LC3- a protein being conjugated to  
56 phosphatidylethanolamine in the autophagosome membrane <sup>16</sup>. Detailed functional analyses,  
57 however, have also revealed a more complex picture of this model. Whereas OPTN and NDP52  
58 are required for mitophagy<sup>14, 15</sup>, p62 appears to be dispensable in some studies but not others <sup>7, 12,</sup>  
59 <sup>17, 18</sup>. Instead, p62 acts to coalesce ubiquitinated mitochondria into large aggregates at the  
60 perinuclear region- a dramatic event yet without a clearly defined function<sup>17, 18</sup>. Recent evidence

61 further indicates that autophagosomes are actually synthesized “de novo” at or around  
62 mitochondria tagged for destruction<sup>15, 19, 20</sup>. How Parkin and different autophagic receptors  
63 coordinate local autophagosome biogenesis around condemned mitochondria to efficiently  
64 execute mitophagy remains to be fully elucidated.

65 Intriguingly, when subject to massive uncoupling by CCCP, the large mitochondrial  
66 populations tagged by Parkin are recognized and actively concentrated by microtubule-based  
67 motors and form large perinuclear aggregates or inclusions<sup>12, 21</sup>. Perinuclear mitochondrial  
68 inclusions have also been observed in neurons from PD patients<sup>22,23</sup>, indicating that this process  
69 is physiologically relevant. Juxtannuclear mitochondrial aggregates, or termed mito-aggresomes,  
70 are subsequently dispersed into smaller units prior to their sequestration by autophagosomes  
71 (mitophagosomes) and eventual degradation<sup>11</sup>. Electron microscopy has revealed that some  
72 perinuclear mitochondria concentrated by Parkin and PINK1 are fused<sup>21</sup>. These findings imply  
73 that dissemination of perinuclear mitochondrial aggregates would require active “de-  
74 aggregation” and “fission” of mitochondria. Thus, the disposal of impaired mitochondria  
75 involves elaborate temporal and spatial regulation orchestrated by Parkin. How Parkin  
76 coordinates these events to achieve robust mitophagy is not well understood.

77 In this report, we present evidence that the recruitment of Parkin to depolarized  
78 mitochondria initiates a series of lipid remodeling events, characterized by the sequential  
79 production of mitochondrial phosphatidic acid (PA) and diacylglycerol (DAG). Using  
80 fluorescent PA and DAG binding reporters, we present evidence that Parkin recruits a  
81 phospholipase, PLD2, to the depolarized mitochondria to generate PA, while activates the PA

82 phosphatase Lipin-1-dependent DAG production through mitochondrial ubiquitination that  
83 recruits ubiquitin-binding autophagic receptors, OPTN and NDP52. We present evidence that  
84 OPTN and NDP52, via Golgi-derived vesicles, deliver a lipid-remodeling factor EndoB1 to the  
85 ubiquitinated mitochondria and stimulate DAG synthesis. Functionally, mitochondrial DAG  
86 drives both the individualization of juxtannuclear mitochondrial aggregates by stimulating F-actin  
87 assembly on mitochondria, and the production of autophagosomes, thereby coupling the  
88 preparation of autophagible mitochondria units with autophagosome sequestration. Our findings  
89 uncover local mitochondrial lipid remodeling as a novel and critical mechanism that ensures  
90 robust mitophagy, and identify the Golgi complex as an important component of mitochondrial  
91 QC machinery.

## 92 **Results:**

### 93 **Parkin stimulates mitochondrial PA and DAG accumulation**

94 PINK1 and Parkin have been shown to promote mitochondrial fusion in response to moderate  
95 mitochondrial stresses induced by low-dose CCCP<sup>24</sup>. In addition to mitofusin (MFN)- and Drp1-  
96 related GTPases, mitochondrial dynamics is affected by membrane lipid composition, in which  
97 mitochondrial phosphatidic acid (PA) and diacylglycerol (DAG) stimulate fusion and fission  
98 respectively<sup>25, 26</sup>. We investigated whether mitochondrial PA or DAG is involved in Parkin-  
99 mediated mitochondrial fusion. To this end, we employed specific fluorescent reporters that  
100 bind PA (EGFP-Raf1-PABD, referred as PA reporter<sup>27</sup>) or DAG (C1b $\delta$ -CFP/YFP, referred as  
101 YFP-DAGR) to monitor PA and DAG production<sup>26, 28</sup>. However, when Parkin-expressing cells  
102 were challenged by low-dose CCCP (1  $\mu$ M), no discernible change was observed for either the

103 PA reporter or DAGR (not shown). Unexpectedly, when these cells were challenged by high-  
104 dose CCCP (10  $\mu$ M) to activate global mitophagy, prominent accumulation of the PA-reporter on  
105 Parkin-tagged mitochondria were observed, as early as 1 hour after CCCP treatment (Fig. 1a,  
106 quantified in Fig. 1c). A different PA-binding reporter (Spo20p-GFP)<sup>29</sup> showed similar  
107 mitochondrial translocation in response to high-dose CCCP treatment (Supplementary Fig. 1a).  
108 Mitophagy activated by antimycin/oligomycin treatment similarly induced concentration of the  
109 PA reporter on mitochondria. (Supplementary Fig. 1b). Using mitochondria-targeted  
110 photosensitizer KillerRed to damage a defined population of mitochondria<sup>20</sup>, the PA reporter was  
111 again detected on Parkin-positive mitochondria (Supplementary Fig. 1d). Collectively, these  
112 findings indicate that PA accumulates on impaired mitochondria tagged by Parkin.

113 To assess whether PA on Parkin-tagged mitochondria is further processed to DAG, we  
114 employed a high-affinity DAG reporter (YFP-DAGR). Under basal conditions YFP-DAGR  
115 mainly labeled perinuclear structures corresponding to the Golgi apparatus, which contains  
116 abundant DAG<sup>30</sup> (Fig. 1b, arrowhead). Upon mitophagy activation by either CCCP or  
117 antimycin/oligomycin treatment, dramatic recruitment of YFP-DAGR to Parkin-tagged  
118 mitochondria was observed (Fig. 1b-1c and Supplementary Fig. 1c). Neither YFP-DAGR nor the  
119 PA reporter accumulated on mitochondria in the absence of Parkin (not shown); however, both  
120 reporters were detected on mitochondria targeted for mitophagy in SH-SY5Y cells, which  
121 express endogenous Parkin (Supplementary Fig. 1e-f). Altogether, the lipid reporter assays  
122 indicate that Parkin stimulates PA and DAG production on mitochondria tagged for autophagy.

123 **Mitochondrial DAG production requires Parkin E3 ligase activity**

124 Parkin activates mitophagy by catalyzing mitochondrial ubiquitination. We assessed two AR-JP  
125 associated Parkin mutants, T240R and T415N, which are deficient in the ubiquitin E3 ligase  
126 activity and cannot support mitophagy<sup>12</sup>. As shown in Fig. 1d, neither mutations affected the  
127 mitochondrial translocation of the PA-reporter. In contrast, mitochondrial YFP-DAGR  
128 accumulation was strongly inhibited (Fig. 1e, quantified in 1f). Thus, mitochondrial  
129 ubiquitination is required for mitochondrial DAG, but not PA, production. These findings  
130 suggest that mitochondrial PA production is initiated by the recruitment of Parkin while DAG  
131 production further requires Parkin E3 ligase activity.

### 132 **PLD2 and Lipin-1 catalyze sequential production of mitochondrial PA and DAG**

133 We next determined how Parkin orchestrates mitochondrial lipid remodeling. Phospholipase D is  
134 the primary enzyme that produces PA. A mitochondrial resident phospholipase D, Mito-PLD  
135 (PLD6), generates mitochondrial PA by hydrolyzing cardiolipin<sup>25</sup>. However, PA reporter  
136 accumulated normally on Parkin-tagged mitochondria in Mito-PLD knockout fibroblasts in  
137 response to CCCP treatment (data not shown). We next investigated whether Parkin recruits a  
138 cytosolic PLD to depolarized mitochondria and catalyze PA production. Of two widely  
139 expressed PLD members, we found that PLD2 (Fig. 2a), but not PLD1 (Supplementary Fig. 2a),  
140 translocated onto Parkin-tagged mitochondria upon treatment with CCCP or  
141 oligomycin/antimycin (Supplementary Fig. 2b). Immunoblotting confirmed that endogenous  
142 PLD2, along with Parkin, became enriched in the mitochondrial fraction in response to CCCP  
143 treatment (Fig. 2b). To determine the role of PLD2 on mitochondrial PA production, we  
144 inhibited PLD2 by a specific inhibitor, VU 0364739<sup>31</sup>, or by siRNA-mediated knockdown.

145 Importantly, mitochondrial accumulation of the PA reporter was markedly suppressed by either  
146 pharmacological inhibition (Fig. 2c-d) or siRNA-mediated knockdown of PLD2 (Supplementary  
147 Fig. 2d-e). PLD2 inhibition also markedly prevented mitochondrial YFP-DAGR accumulation  
148 (Supplementary Fig. 2f). These findings indicate that Parkin stimulates mitochondrial PA  
149 production by recruiting PLD2, and that PLD2-generated PA is a precursor to mitochondrial  
150 DAG.

151 To determine how PA is converted to DAG, we knocked down Lipin-1, a major cytosolic  
152 phosphatase that dephosphorylates PA to DAG <sup>26,32</sup>. Lipin-1 knockdown led to a dramatic loss  
153 of DAGR-YFP on Parkin-tagged mitochondria (Fig. 2e, Lipin-1 KD) while the PA reporter was  
154 not affected (Supplementary Fig. 2h). Re-expression of a siRNA-resistant WT Lipin-1 in Lipin-1  
155 KD cells significantly restored mitochondrial DAGR-YFP while a catalytic inactive mutant  
156 (Lipin-1 CD) was ineffective (Fig. 2f). Together, these findings demonstrate that PLD2 and  
157 Lipin-1 work in tandem to generate PA and DAG on mitochondria tagged by Parkin.

### 158 **DAG coordinates F-actin-dependent mitochondrial dissemination and mitophagy**

159 Compared to WT control, we found that Lipin-1 knockdown cells were less efficient in  
160 mitochondrial clearance, as shown by the significant retention of mitochondria following CCCP  
161 treatment (Fig. 3a, bottom panels, quantified in Fig. 3b). Immunoblotting analysis confirmed that  
162 autophagy-dependent degradation of multiple mitochondrial markers was impaired in lipin-1 KD  
163 cells, whereas proteasome-mediated degradation of MFN1 was unaffected (Fig. 3c and  
164 Supplementary Fig. 2i). PLD2 inhibition, which suppressed the production of mitochondrial PA,  
165 the precursor to DAG, also reduced the efficiency of mitophagy (Supplementary Fig. 2j). These



166 results support the conclusion that mitochondrial DAG production is important for Parkin-  
167 mediated mitophagy.

168 During mitophagy, individual mitochondria became dispersed from the perinuclear  
169 aggregates prior to their sequestration by autophagosomes<sup>11</sup>. Indeed, we observed many small  
170 Parkin-positive mitochondria separated from the perinuclear cluster during mitophagy (Fig. 3d,  
171 Top Panels). Strikingly, in Lipin-1 KD cells, significantly fewer “individualized and dispersed”  
172 mitochondria were observed. Instead, mitochondria frequently remained as large perinuclear  
173 aggregates (Fig. 3d, Bottom Panels; quantified in Fig. 3e). These findings indicate that Lipin-1 is  
174 required for the dispersion of mitochondrial aggregates prior to autophagic sequestration.

175 Autophagic clearance of perinuclear protein inclusions, the aggresomes, requires active de-  
176 aggregation implemented by the actin cytoskeleton<sup>33</sup>. Because DAG is a known activator of F-  
177 actin assembly on the plasma membranes and endosomes<sup>34, 35</sup>, we asked whether Lipin-1-  
178 dependent DAG production activates mitochondrial de-aggregation by promoting F-actin  
179 assembly. To this end, we first used an F-actin binding probe, RFP-LifeAct<sup>36</sup>, to assess if F-actin  
180 was assembled around mitochondrial aggregates. As shown in Fig. 3f, prominent LifeAct-  
181 positive signals were detected on de-aggregated mitochondria (Middle Panels), suggesting that  
182 F-actin is involved in mitochondrial de-aggregation. Supporting this hypothesis, inhibition of F-  
183 actin assembly by cytochalasin B (Cyto B) markedly suppressed the appearance of RFP-LifeAct  
184 positive mitochondria (Fig. 3f, Bottom Panels) and the dispersion of mitochondrial aggregates  
185 (Quantified in Fig. 3 g). Importantly, Lipin-1 knockdown also suppressed the appearance of  
186 LifeAct positive-mitochondria (Fig. 3h). These results support the conclusion that Lipin-1-

187 dependent production of mitochondrial DAG stimulates local F-actin assembly to divide and  
188 disperse perinuclear mitochondrial aggregates for autophagic degradation.

### 189 **Lipin1-dependent DAG stimulates autophagosome production**

190 We noticed that abundant accumulation of YFP-DAGR on mitochondria apparently retarded  
191 mitochondrial clearance, as indicated by the continuous accumulation of YFP-DAGR positive  
192 mitochondria after prolonged CCCP treatment (Fig. 1c, 18 hr). This finding is consistent with the  
193 notion that high affinity DAGR can mask mitochondrial DAG from the downstream effectors.  
194 To follow the fate of DAG at a later stage of mitophagy, we employed another DAG reporter  
195 with a lower binding affinity, C1(2)-mRFP (referred as RFP-DAGR<sup>37</sup>). Under basal condition,  
196 RFP-DAGR also mainly labeled the Golgi complex (Fig. 4a, top panels, arrowhead) positive for  
197 a trans-Golgi marker TGN46 (Supplementary Fig. 3a). Interestingly, upon CCCP treatment,  
198 many RFP-DAGR positive vesicles encompassing dispersed parkin-tagged mitochondria were  
199 observed (Fig. 4b, Top Panels). Similar structures were also detected using the YFP-DAGR  
200 reporter expressed at a lower concentration (Supplementary Fig. 3b). Importantly, RFP-DAGR -  
201 labeled vesicles are frequently positive for the autophagosome marker LC3 (Fig. 4b) suggesting  
202 that mitochondrial DAG is also involved in the production of autophagosomes that restrict  
203 damaged mitochondria (i.e. mitophagosomes). Supporting this possibility, the abundance of  
204 LC3-positive vesicles was markedly reduced in Lipin-1 KD cells after CCCP treatment (Fig. 4b,  
205 bottom panels, and quantified in Fig. 4c). The LC3 signals remained in Lipin-1 KD cells were  
206 typically small and did not contain mitochondria (Fig. 4b, Zoomed Insets). As expected,  
207 mitophagy-associated RFP-DAGR induction was suppressed in Lipin-1 KD (Fig. 4b, bottom

208 panels, Red). Collectively, these findings indicate that Lipin-1 and mitochondrial DAG  
209 production stimulate mitophagosome production.

210 To confirm the role of DAG in mitophagosome production, we supplied Lipin-1 KD cells  
211 with a cell permeable 1,2-dipalmitoyl-sn-glycerol (DPG), an effector DAG species produced by  
212 Lipin-1<sup>38</sup>. DPG supplement (+DPG Panels) markedly stimulated both the appearance of  
213 dispersed mitochondria and large LC3-positive vesicles, many of those contained mitochondria  
214 (Fig. 4d, Zoomed Inset; Quantified in Fig. 4e-f). These results indicate that mitochondrial DAG  
215 produced by Lipin-1 promotes both mitochondrial dissemination and the production of  
216 autophagosomes that sequester dispersed mitochondria.

### 217 **Mitochondrial DAG production requires ubiquitin-binding NDP52 and Optineurin**

218 Parkin-dependent mitochondrial DAG production requires its ubiquitin E3 ligase activity (Fig.  
219 1e). Mitochondrial ubiquitination was shown to recruit ubiquitin-binding autophagic receptors  
220 OPTN and NDP52<sup>14, 15</sup>. We, therefore, determined if OPTN and NDP52 are involved in  
221 mitochondrial DAG production. Consistent with their redundant functions in mitophagy<sup>15</sup>,  
222 individual knockdown of OPTN or NDP52 had no discernable effect on mitochondrial YFP-  
223 DAGR accumulation (Supplemental Fig. 4a). Simultaneous knockdown of these autophagic  
224 receptors, however, abrogated mitochondrial YFP-DAGR accumulation (Fig. 5a-b). Re-  
225 expression of an siRNA-resistant WT OPTN, but not a ubiquitin-binding deficient (E478G)  
226 mutant OPTN<sup>14</sup>, restored mitochondrial DAGR recruitment, supporting a specific and ubiquitin-  
227 dependent activity of OPTN in mitochondrial lipid remodeling (Fig. 5b). Consistent with their  
228 role in mitochondrial DAG production, OPTN/NDP52 KD also suppressed the formation of

229 RFP-DAGR-positive LC3 vesicles (mitophagosomes, Supplementary Fig. 4b). Importantly,  
230 exogenous DPG treatment markedly increased mitophagy in OPTN/NDP52 KD cells (Fig. 5c-d).  
231 These findings show that a key function of OPTN and NDP52 in mitophagy is to promote  
232 mitochondrial DAG production.

### 233 **Mitochondrial DAG production requires Golgi associated EndoB1**

234 Although commonly known as autophagic receptors, OPTN and NDP52 were initially  
235 characterized as trans-Golgi associated proteins that regulate Golgi vesicle transport<sup>39,40</sup>. Indeed,  
236 fluorescence-tagged OPTN (OPTN-Cherry) appeared as perinuclear vesicle-like structures that  
237 were partially co-localized with a trans-Golgi marker, TGN38 (TGN38-GFP) (Fig. 6a, Top  
238 Panels). Importantly, TGN38, along with OPTN, became accumulated on Parkin-tagged  
239 mitochondria upon CCCP treatment (Fig. 6a, Bottom Panels). These observations suggest that  
240 OPTN-TGN38-associated vesicles translocate onto ubiquitinated mitochondria tagged by Parkin.  
241 These findings raise the possibility that OPTN might deliver factor(s) from the Golgi complex or  
242 associated vesicles to ubiquitinated mitochondria, and thereby stimulate Lipin1-dependent DAG  
243 production. We searched for potential Golgi factor(s) that is known to modify membrane lipid  
244 composition and regulate mitophagy. One such a candidate identified is Endophilin B1 (EndoB1,  
245 also known as Bif-1), which was reported to possess an intrinsic PA-binding activity<sup>41</sup> and is  
246 require for mitophagy<sup>41, 42</sup>. We found that EndoB1 was concentrated on the OPTN-positive  
247 vesicles under basal conditions. In response to CCCP, EndoB1 became associated with Parkin-  
248 and OPTN-tagged mitochondria (Fig. 6b). Mitochondrial recruitment of EndoB1, along with  
249 OPTN, was confirmed by immunoblotting (Fig. 6c). Supporting EndoB1 as a potential cargo

250 delivered to mitochondria by OPTN/NDP52, mitochondrial recruitment of EndoB1 was  
251 markedly reduced in OPTN/NDP52 KD cells (Fig. 6d-e). Importantly, knockdown of EndoB1  
252 suppressed the accumulation of YFP-DAGR on Parkin-tagged mitochondria (Fig. 6f-g) but had  
253 no effect on PA reporter translocation (Supplementary Fig. 5a). Consistent with its effect on  
254 mitochondrial DAG production, EndoB1 knockdown also reduced the production of DAGR-  
255 positive LC3 vesicles (Supplementary Fig. 5b), These findings indicate that OPTN and NDP52  
256 promote mitochondrial DAG production and mitophagy, at least in part, by delivering EndoB1 to  
257 ubiquitinated mitochondria.

## 258 **Discussion**

259 Large-scale mitophagy activated by Parkin and CCCP treatment involves elaborate steps  
260 including tagging and transporting impaired mitochondria to the MTOC, followed by active  
261 dispersion to generate autophagible mitochondrial units, and de novo assembly of  
262 autophagosomes to restrict the dispersed mitochondria. In this report, we presented evidence that  
263 Parkin coordinates these complex events, at least in part, by stimulating local lipid remodeling on  
264 impaired mitochondria. The sequential production of mitochondrial PA and DAG activates actin-  
265 dependent dispersion of aggregated mitochondria and local autophagosome production, thereby  
266 enabling the efficient disposal of a large population of impaired mitochondria.

267 Our data show that Parkin orchestrates mitochondrial lipid remodeling via two enzymes, PLD2  
268 and Lipin-1. Co-immunoprecipitation analysis indicates that Parkin can associate with PLD2 in  
269 response to mitophagy activation (Supplementary Fig. 2c). We, therefore, propose that the  
270 production of PA entails stable mitochondrial interaction of Parkin, which recruits PLD2 to the

271 impaired mitochondria. The subsequent conversion of PA to DAG further requires Parkin  
272 ubiquitin ligase activity, indicating that Lipin-1, by itself, is not able to efficiently convert  
273 mitochondrial PA to DAG. Unlike PLD2, we did not detect apparent recruitment of Lipin-1 to  
274 Parkin-tagged mitochondria (data not shown). Instead, our data suggest that ubiquitin-binding  
275 autophagy receptors, OPTN and NDP52, deliver one or more co-factors to ubiquitinated  
276 mitochondria to enable Lipin-1-dependent DAG production. One such a co-factor we identified  
277 is EndoB1, which has an intrinsic PA binding activity<sup>41</sup>. Our evidence suggests that EndoB1 is  
278 delivered by OPTN-positive Golgi-vesicles to ubiquitinated mitochondria (Fig. 6), where the  
279 mitochondrion-localized EndoB1 might bridge Lipin-1 and mitochondrial PA to produce DAG.  
280 Therefore, Parkin utilizes both ubiquitin-independent and -dependent process to orchestrate  
281 mitochondrial lipid remodeling.

282 The analysis of mitophagy phenotypes in Lipin-1-deficient cells has uncovered two inter-  
283 connected activities for mitochondrial DAG: activation of F-actin assembly and production of  
284 autophagosomes. It was previously observed that dispersion of perinuclear mitochondrial  
285 aggregates precedes autophagic sequestration of impaired mitochondria<sup>11</sup>. Our data now provide  
286 evidence that the dispersion of mitochondrial aggregate is facilitated by the assembly of the actin  
287 cytoskeleton surrounding “aggregated” mitochondria (Fig. 3f, Middle Panels). Either inactivation  
288 of Lipin-1 or treatment with an actin polymerization inhibitor, cytochalasin B, effectively  
289 suppress mitochondrial de-aggregation (Fig. 3f, Bottom Panels and Fig. 3h). The actin  
290 cytoskeleton could, in principle, enable mechanical force production to separate individual  
291 mitochondria from the perinuclear cluster- a scenario similar to the actinomyosin-dependent de-

292 aggregation of perinuclear protein inclusions, the aggresomes<sup>33</sup>. Indeed, cortactin, a key co-  
293 factor for F-actin assembly, is required for the clearance of both aggresomes and mitochondrial  
294 aggregates<sup>12, 43</sup>. Evidence also showed that active mitochondrial division mediated by Drp1 is  
295 necessary for efficient mitophagy<sup>10</sup>. Drp1-mediated mitochondrial fission also requires the  
296 cortactin-dependent actin cytoskeleton and involves EndoB1<sup>44, 45, 46</sup>. These findings support a  
297 model whereby mitochondrial DAG produced by EndoB1 and Lipin-1 nucleates local F-actin  
298 assembly to enable mitochondrial fission and dispersion.

299 Our analysis also revealed that Parkin-dependent DAG promotes mitophagosome  
300 production (Fig. 4). Accordingly, local production of DAG on Parkin- and ubiquitin-tagged  
301 mitochondria could, in principle, simultaneously activate focal mitochondrial fission/dispersion  
302 and de novo autophagosome production - providing a coupling mechanism to ensure  
303 “condemned” mitochondria are efficiently “restricted” by autophagosomes. Supporting the  
304 instructive role of DAG in autophagy activation, a cell-permeable DAG (DPG) can stimulate  
305 LC3-positive vesicle production in Lipin-1 KD cells (Fig. 4d-f). DPG treatment also markedly  
306 restored mitophagy in OPTN/NDP52 KD cells (Fig. 5c-d). The finding revealed that one key  
307 function of autophagic receptors in mitophagy is to stimulate DAG production. Interestingly,  
308 recent studies have revealed a surprising role of the actin cytoskeleton on autophagosome  
309 formation<sup>47, 48</sup>. We propose that DAG-mediated F-actin assembly coordinates both the  
310 dispersion of mitochondria and local autophagosome assembly. Our data, however, do not  
311 exclude the potential effect of mitochondrial DAG on proteasome activity during mitophagy.

312           How mitochondrial DAG activates actin assembly remains to be determined. By mass  
313 spectrometry-based lipid analysis, we have detected a dramatic accumulation (>10 fold) of  
314 selected mitochondrial DAG species on mitochondria tagged for autophagy in response to CCCP  
315 treatment (Supplementary Fig. 6). This finding not only confirmed the production of  
316 mitochondrial DAG during mitophagy but also revealed that most prominently induced DAG  
317 species were those with long acyl chains (C38:4 and C38:3 as well as 36:2 and 36:1) while C32  
318 and C34 species were not induced (Supplementary Fig. 6). Both C38:4 DAG (1-stearoyl-2-  
319 arachidonoyl-*sn*-glycerol; SAG) and C36:2 (1-stearoyl-2-linoleoyl-*sn*-glycerol; SLG) are potent  
320 PKC activators. These findings raise the possibility that mitochondrial DAG plays a signaling  
321 role and locally activates PKC on Parkin-tagged mitochondria to affect mitophagy. We further  
322 note that many LC3-positive autophagosomes produced during mitophagy are also labeled by the  
323 DAGR (Fig. 4b, Supplementary Fig. 3b), suggesting that DAG might have additional functions  
324 in the later stage of mitophagy. Future studies will be required to test these possibilities.

325 Perinuclear mitochondrial inclusions have been observed in both PD patients and a mouse PD  
326 model<sup>22, 23, 49</sup>. Perinuclear protein inclusion, the Lewy body, is a defining pathological feature of  
327 PD<sup>50</sup>. Despite their prevalence, the physiological purpose of concentrating “cellular junk” to the  
328 perinuclear region remains uncertain. Our findings suggest that perinuclear OPTN-associated  
329 and Golgi-derived vesicles are involved in mitochondrial DAG production and mitophagy. As  
330 the Golgi complex is normally located at the MTOC/perinuclear region, retrograde transport of  
331 impaired mitochondria and protein aggregates would place them close to the Golgi complex or  
332 Golgi-derived vesicles. Such an arrangement, in principle, could ensure a ready access of



333 damaged mitochondria or protein aggregates to the OPTN/NDP52 vesicles for autophagic  
334 processing. Interestingly, the endoplasmic reticulum (ER) was proposed to play a critical role in  
335 mitophagy initiated at focally damaged mitochondria<sup>20</sup>. We surmise that when the production of  
336 damaged mitochondria exceeds the capacity of local autophagic degradation machinery  
337 (**peripheral autophagy**)- for example under chronic pathological conditions associated with  
338 neurodegenerative disease- the “overflowed” ubiquitin- and p62-tagged mitochondria would  
339 become engaged and transported by dynein motors to access the Golgi-associated vesicles and  
340 perinuclear autophagy machinery (**central autophagy**). Accordingly, the prevalence of  
341 perinuclear inclusions in PD patients could reflect the active role of the Golgi complex/vesicles  
342 in managing excessive cellular junk that accumulates in ailing neurons. Interestingly, many PD-  
343 associated PARK genes have been linked to Golgi integrity or Golgi-associated vesicular  
344 trafficking<sup>51, 52, 53, 54, 55, 56</sup>. It is tantalizing to speculate that Golgi dysfunction might be a risk  
345 factor for PD and that impaired central autophagy would weaken the clearance of protein  
346 aggregates or mitochondria, resulting in perinuclear inclusions.

347         In conclusion, our study has uncovered PLD2-EndoB1-Lipin 1 dependent mitochondrial  
348 lipid remodeling as a critical event in Parkin-dependent autophagic clearance of impaired  
349 mitochondria. Indeed, aberrant accumulation of mitochondria has been noted in Lipin 1 and  
350 EndoB1 knockout mice<sup>38, 57</sup>, although the state of mitochondria in PLD2 knockout mice remains  
351 to be characterized. The effect of exogenous DPG to substitute for endogenous DAG in  
352 stimulating autophagosome production and mitophagy suggests that specific DAG-mimetics  
353 might improve mitochondrial QC in ailing neurons. Similar to impaired mitochondria, we have

354 found that photo-damaged lysosomes targeted for autophagic clearance<sup>58</sup> also accumulated the  
355 PA reporter (W.Y.Y, Unpublished observation). An association of DAG on salmonella targeted  
356 for xenophagy has similarly been reported<sup>59</sup>. Thus, our study suggests that local lipid remodeling  
357 might be a conserved mechanism to implement autophagy-dependent organelle quality control  
358 (QC) and antibacterial defense.

359  
360  
361

## 362 **Materials and Methods**

363

### 364 **Antibodies and Reagents**

365 The following primary antibodies were used: anti-Tom20 (Santa Cruz sc-11415), anti-  
366 cytochrome c (BD Bioscience 556432), anti-GAPDH (Cell Signaling 14C10, 2118), anti-actin  
367 (Sigma AC-15, A1978), anti-EndoB1 (R&D, AF7456), anti-Tim23 (BD Bioscience), anti-Mfn2  
368 (Santa Cruz sc-50331), anti-Mfn1 (Santa Cruz), anti-LC3 (MBL International), anti-FLAG (M2  
369 Sigma F7425), anti-lipin-1 (Cell Signaling 5195), anti-PLD2 (Scbt sc-515744), Citrate  
370 synthetase (GTX110624, GeneTex), Hsp60 (Cell Signaling, 4870). Secondary antibodies were  
371 from Jackson Immunochem or Invitrogen.

372 The following reagents were used: DMSO (Sigma D8418), carbonyl cyanide 5-chloro-  
373 phenylhydrazone (CCCP) (Sigma), PLD2 inhibitor VU 0364739 hydrochloride (Tocris 4171),  
374 Cytochalasin B (Sigma), and 1,2-dipalmitoyl-sn-glycerol (Sigma D9135)

### 375 **Cell Culture**

376 HeLa and HEK293T cells were obtained from Duke Cell Culture Facility (Durham, NC, USA).  
377 The cells were cultured in Dulbecco's modified Eagle's medium (DMEM; GIBCO-11995)  
378 supplemented with 10% fetal bovine serum and 1 × antibiotics (penicillin, 10,000 UI/ml and  
379 streptomycin, 10,000 UI/ml). These cell lines have been authenticated by STR DNA profiling  
380 and validated to be *mycoplasma*-free and before being frozen by the Duke Cell Culture Facility  
381 (Durham, NC, USA). All cells were maintained at 37°C and 5% CO<sub>2</sub>.

### 382 **Plasmids and Transfection**

383 The following plasmids/siRNAs/shRNAs were used: GFP-Parkin and mutants as previously  
384 described<sup>12</sup>; mcherry-Parkin<sup>20</sup>; GFP-Raf1-PABD and CFP/YFP-DAGR<sup>26</sup>; mcherry-optineurin<sup>14</sup>;  
385 YFP-PLD1 and YFP-PLD2 (Gifts from W.G. Zhang); RFP-LifeAct (ibidi). mCherry-Raf1-  
386 PABD was generated by sub-cloning the PABD domain from GFP-Raf1-PABD to  
387 mCherry2(C1). Expression plasmids for WT and catalytic mutant mouse Lipin-1 were obtained  
388 from Addgene. Lipin-1 siRNA 5'-GAAUGGAAUGCCAGCUGAA-3' and 3'-  
389 UUCAGCUGGCAUUC-5' (Invitrogen; HSS118307 (Sigma); optineurin siRNA  
390 (Invitrogen 4392420), NDP52 siRNA 5'-UUCAGUUGAAGCAGCUCUGUCUCCC-3'<sup>60</sup>,  
391 EndoB1 siRNA 5'-UGUUUAUACGACUUGGAGCUU-3' and 3'-  
392 AAGCUCCAAGUCGUAUAAACA-5' (Invitrogen), control siRNA (Ambion). Expression  
393 plasmids were transfected in HeLa and YFP-Parkin HeLa using Xtreme Gene 9 (Roche)  
394 according to manufacturer's directions. Cells were transfected and treated 24-48 hours later.  
395 shRNA plasmids were transfected as stated above, but cells were not treated until 3-5 days later.  
396 siRNAs were transfected using RNAi MAX (Invitrogen) according to the manufacturer's  
397 directions and cells treated 48-72 hours later.

### 398 **Immunofluorescence microscopy and quantification**

399 Cells were seeded on coverslips, transfected, treated as indicated, and fixed in 4% PFA for 15  
400 minutes. Coverslips were rinsed in PBS, permeabilized with 0.2% Triton-X 100 in PBS for 5  
401 minutes, blocked in 10% BSA for 20 minutes in a humidified chamber, and incubated in primary  
402 antibodies diluted in 10% BSA overnight at 4C, followed by secondary antibodies in 10% BSA  
403 for 30 minutes. Coverslips were mounted on slides using Fluoromount G (Southern Biotech).

404 Slides were analyzed on a Leica SP5 confocal microscope using 100x/1.4-0.70NA or 40x oil  
405 objective (Leica Plan Apochromat). Z-stack images were acquired using the Leica LAS AF  
406 program software and maximum projections used in analyses and figures. Changes to brightness  
407 and contrast were performed in ImageJ. Number and size of vesicles were measured and  
408 quantified using Particle Analysis module in Image J.

409 For all immunofluorescent quantifications, at least 35 to 50 cells were counted for 2-3 separate  
410 experiments. Graphs represent means +/- SEM. For comparison of two conditions, a two-tailed,  
411 unequal student's t-test was performed with  $p < 0.05$  considered significant. For all other  
412 comparisons, a one-way or two-way ANOVA was conducted.

#### 413 **Preparation of mitochondrial fractions**

414 The isolation of mitochondria from cultured cells was performed by following manufacturer's  
415 protocol (#89874, ThermoFisher). In brief, after CCCP treatment, the cells harvested from a 10  
416 cm plate ( $\sim 3 \times 10^4$  cells) were first resuspended in reagent A. Cell membrane was then lysed  
417 using a reagent-based method by adding reagent B. After removing cell debris by low-speed  
418 centrifugation, the mitochondrial fractions were collected in pellets with high speed  
419 centrifugation. The remaining supernatant is cytosol fraction. Mitochondrial fractions were  
420 further subject to Western blots or lipidomic analysis.

#### 421 **Western blots**

422 HeLa or YFP-Parkin HeLa were seeded onto 10 cm or 6 cm dishes, transfected as outlined above,  
423 and treated as described. For western blot analysis, whole cell lysates were collected using  
424 170mM NETN buffer, incubated at 4°C for 30 minutes, spun, supernatant collected, and protein

425 concentration measured using the BCA assay (Thermo Scientific). Samples were normalized,  
426 diluted in XT buffer with reducing agent (BioRad), and boiled for 5 minutes at 100°C. 4-20%  
427 TGX gels (BioRad) were used, followed by transfer to nitrocellulose membranes. Primary  
428 antibodies were added to 2% BSA, incubated overnight at 4C, followed by rinsing, secondary  
429 antibody incubation for 1 hour at room temperature, rinsing, and developing using either ECL  
430 PicoWest (Thermo Scientific) or ECL Pro Lightning (Perkin-Elmer). Films were scanned,  
431 cropped, and adjusted for brightness and contrast in Photoshop. Density of bands was measured  
432 using Image J.

### 433 **Lipid extraction and LC/MS analysis**

434 Lipid extraction of purified mitochondria was performed using a modified Bligh-Dyer method as  
435 previously decried <sup>61</sup>. For LC/MS analysis, the dried lipid extracts were dissolved in  
436 chloroform/methanol (2:1, v/v) and injected for normal phase LC/MS analysis on an Agilent  
437 1200 Quaternary LC system equipped with an Ascentis Silica HPLC column (5 µm, 25 cm x 2.1  
438 mm, Sigma-Aldrich, St. Louis, MO). Mobile phase A consisted of  
439 chloroform/methanol/aqueous ammonium hydroxide (800:195:5, v/v/v); mobile phase B  
440 consisted of; mobile phase C consisted of. The elution program consisted of the following: 100%  
441 mobile phase A (chloroform/methanol/aqueous ammonium hydroxide; 800:195:5, v/v/v) was  
442 held isocratically for 2 min and then linearly increased to 100% mobile phase B  
443 (chloroform/methanol/water/aqueous ammonium hydroxide; 600:340:50:5, v/v/v/v) over 14 min  
444 and held at 100% B for 11 min. The LC gradient was then changed to 100% mobile phase C  
445 (chloroform/methanol/water/aqueous ammonium hydroxide; 450:450:95:5, v/v/v/v) over 3 min

446 and held at 100% C for 3 min, and finally returned to 100% A over 0.5 min and held at 100% A  
447 for 5 min. The LC eluent (with a total flow rate of 300  $\mu$ l/min) was introduced into the ESI  
448 source of a high resolution TripleTOF5600 mass spectrometer (Sciex, Framingham, MA).  
449 Instrumental settings for negative ion ESI/MS analysis of lipid species were as follows: IS= -  
450 4500 V; CUR= 20 psi; GSI= 20 psi; DP= -55 V; and FP= -150 V. The MS/MS analysis used  
451 nitrogen as the collision gas. Data analysis was performed using Analyst TF1.5 software (Sciex,  
452 Framingham, MA).

### 453 **Data availability**

454 All data supporting the findings of this study are available from the authors upon reasonable  
455 request. The source data underlying Figs 2d, 2f, 3b, 4e ,4f ,5b and 5d and Supplementary Figs 1a  
456 and 5d are provided as a Source Data file. Uncropped images of Western blots are shown  
457 (Supplementary Fig. 7).

458

459

460 **References**

- 461
- 462
- 463 1. Shimura H, *et al.* Familial Parkinson disease gene product, parkin, is a ubiquitin-protein  
464 ligase. *Nat Genet* **25**, 302-305 (2000).  
465
- 466 2. Park J, *et al.* Mitochondrial dysfunction in *Drosophila* PINK1 mutants is complemented  
467 by parkin. *Nature* **441**, 1157-1161 (2006).  
468
- 469 3. Clark IE, *et al.* *Drosophila* pink1 is required for mitochondrial function and interacts  
470 genetically with parkin. *Nature* **441**, 1162-1166 (2006).  
471
- 472 4. Yang Y, *et al.* Mitochondrial pathology and muscle and dopaminergic neuron  
473 degeneration caused by inactivation of *Drosophila* Pink1 is rescued by Parkin. *Proc Natl*  
474 *Acad Sci U S A* **103**, 10793-10798 (2006).  
475
- 476 5. Narendra D, Tanaka A, Suen DF, Youle RJ. Parkin is recruited selectively to impaired  
477 mitochondria and promotes their autophagy. *J Cell Biol* **183**, 795-803 (2008).  
478
- 479 6. Zhang CW, Hang L, Yao TP, Lim KL. Parkin Regulation and Neurodegenerative  
480 Disorders. *Front Aging Neurosci* **7**, 248 (2015).  
481
- 482 7. Geisler S, *et al.* PINK1/Parkin-mediated mitophagy is dependent on VDAC1 and  
483 p62/SQSTM1. *Nat Cell Biol* **12**, 119-131 (2010).  
484
- 485 8. Matsuda N, *et al.* PINK1 stabilized by mitochondrial depolarization recruits Parkin to  
486 damaged mitochondria and activates latent Parkin for mitophagy. *J Cell Biol* **189**, 211-  
487 221 (2010).  
488
- 489 9. Narendra DP, *et al.* PINK1 is selectively stabilized on impaired mitochondria to activate  
490 Parkin. *PLoS Biol* **8**, e1000298 (2010).  
491
- 492 10. Tanaka A, *et al.* Proteasome and p97 mediate mitophagy and degradation of mitofusins  
493 induced by Parkin. *J Cell Biol* **191**, 1367-1380 (2010).  
494
- 495 11. Chan NC, *et al.* Broad activation of the ubiquitin-proteasome system by Parkin is critical  
496 for mitophagy. *Hum Mol Genet*, (2011).  
497
- 498 12. Lee JY, Nagano Y, Taylor JP, Lim KL, Yao TP. Disease-causing mutations in Parkin  
499 impair mitochondrial ubiquitination, aggregation, and HDAC6-dependent mitophagy. *J*  
500 *Cell Biol* **189**, 671-679 (2010).  
501



- 502 13. Yoshii SR, Kishi C, Ishihara N, Mizushima N. Parkin mediates proteasome-dependent  
503 protein degradation and rupture of the outer mitochondrial membrane. *J Biol Chem* **286**,  
504 19630-19640 (2011).  
505
- 506 14. Wong YC, Holzbaur EL. Optineurin is an autophagy receptor for damaged mitochondria  
507 in parkin-mediated mitophagy that is disrupted by an ALS-linked mutation. *Proc Natl*  
508 *Acad Sci U S A* **111**, E4439-4448 (2014).  
509
- 510 15. Lazarou M, *et al.* The ubiquitin kinase PINK1 recruits autophagy receptors to induce  
511 mitophagy. *Nature* **524**, 309-314 (2015).  
512
- 513 16. Pankiv S, *et al.* p62/SQSTM1 binds directly to Atg8/LC3 to facilitate degradation of  
514 ubiquitinated protein aggregates by autophagy. *J Biol Chem* **282**, 24131-24145 (2007).  
515
- 516 17. Narendra D, Kane LA, Hauser DN, Fearnley IM, Youle RJ. p62/SQSTM1 is required for  
517 Parkin-induced mitochondrial clustering but not mitophagy; VDAC1 is dispensable for  
518 both. *Autophagy* **6**, 1090-1106 (2010).  
519
- 520 18. Okatsu K, *et al.* p62/SQSTM1 cooperates with Parkin for perinuclear clustering of  
521 depolarized mitochondria. *Genes Cells* **15**, 887-900 (2010).  
522
- 523 19. Itakura E, Kishi-Itakura C, Koyama-Honda I, Mizushima N. Structures containing Atg9A  
524 and the ULK1 complex independently target depolarized mitochondria at initial stages of  
525 Parkin-mediated mitophagy. *J Cell Sci* **125**, 1488-1499 (2012).  
526
- 527 20. Yang JY, Yang WY. Bit-by-bit autophagic removal of parkin-labelled mitochondria. *Nat*  
528 *Commun* **4**, 2428 (2013).  
529
- 530 21. Vives-Bauza C, *et al.* PINK1-dependent recruitment of Parkin to mitochondria in  
531 mitophagy. *Proc Natl Acad Sci U S A* **107**, 378-383 (2010).  
532
- 533 22. Hayashida K, Oyanagi S, Mizutani Y, Yokochi M. An early cytoplasmic change before  
534 Lewy body maturation: an ultrastructural study of the substantia nigra from an autopsy  
535 case of juvenile parkinsonism. *Acta Neuropathol* **85**, 445-448 (1993).  
536
- 537 23. Gai WP, Yuan HX, Li XQ, Power JT, Blumbergs PC, Jensen PH. In situ and in vitro  
538 study of colocalization and segregation of alpha-synuclein, ubiquitin, and lipids in Lewy  
539 bodies. *Exp Neurol* **166**, 324-333 (2000).  
540
- 541 24. Norris KL, *et al.* Convergence of parkin, PINK1 and alpha-synuclein on stress-induced  
542 mitochondrial morphological remodelling. *J Biol Chem*, (2015).  
543

- 544 25. Choi SY, Huang P, Jenkins GM, Chan DC, Schiller J, Frohman MA. A common lipid  
545 links Mfn-mediated mitochondrial fusion and SNARE-regulated exocytosis. *Nat Cell*  
546 *Biol* **8**, 1255-1262 (2006).  
547
- 548 26. Huang H, *et al.* piRNA-associated germline nuage formation and spermatogenesis require  
549 MitoPLD profusogenic mitochondrial-surface lipid signaling. *Dev Cell* **20**, 376-387  
550 (2011).  
551
- 552 27. Rizzo MA, Shome K, Watkins SC, Romero G. The recruitment of Raf-1 to membranes is  
553 mediated by direct interaction with phosphatidic acid and is independent of association  
554 with Ras. *J Biol Chem* **275**, 23911-23918 (2000).  
555
- 556 28. Giorgione JR, Lin JH, McCammon JA, Newton AC. Increased membrane affinity of the  
557 C1 domain of protein kinase Cdelta compensates for the lack of involvement of its C2  
558 domain in membrane recruitment. *J Biol Chem* **281**, 1660-1669 (2006).  
559
- 560 29. Kassas N, *et al.* Genetically encoded probes for phosphatidic acid. *Methods Cell Biol* **108**,  
561 445-459 (2012).  
562
- 563 30. Baron CL, Malhotra V. Role of diacylglycerol in PKD recruitment to the TGN and  
564 protein transport to the plasma membrane. *Science* **295**, 325-328 (2002).  
565
- 566 31. Lavieri RR, *et al.* Design, synthesis, and biological evaluation of halogenated N-(2-(4-  
567 oxo-1-phenyl-1,3,8-triazaspiro[4.5]decan-8-yl)ethyl)benzamides: discovery of an  
568 isoform-selective small molecule phospholipase D2 inhibitor. *J Med Chem* **53**, 6706-  
569 6719 (2010).  
570
- 571 32. Han GS, Wu WI, Carman GM. The *Saccharomyces cerevisiae* Lipin homolog is a Mg<sup>2+</sup>-  
572 dependent phosphatidate phosphatase enzyme. *J Biol Chem* **281**, 9210-9218 (2006).  
573
- 574 33. Hao R, *et al.* Proteasomes activate aggresome disassembly and clearance by producing  
575 unanchored ubiquitin chains. *Mol Cell* **51**, 819-828 (2013).  
576
- 577 34. Shariff A, Luna EJ. Diacylglycerol-stimulated formation of actin nucleation sites at  
578 plasma membranes. *Science* **256**, 245-247 (1992).  
579
- 580 35. Taunton J, *et al.* Actin-dependent propulsion of endosomes and lysosomes by recruitment  
581 of N-WASP. *J Cell Biol* **148**, 519-530 (2000).  
582
- 583 36. Riedl J, *et al.* Lifeact: a versatile marker to visualize F-actin. *Nat Methods* **5**, 605-607  
584 (2008).  
585

- 586 37. Adachi E, *et al.* A technique for monitoring multiple signals with a combination of prism-  
587 based total internal reflection fluorescence microscopy and epifluorescence microscopy.  
588 *Pflugers Arch* **459**, 227-234 (2009).  
589
- 590 38. Zhang P, Verity MA, Reue K. Lipin-1 regulates autophagy clearance and intersects with  
591 statin drug effects in skeletal muscle. *Cell Metab* **20**, 267-279 (2014).  
592
- 593 39. Sahlender DA, *et al.* Optineurin links myosin VI to the Golgi complex and is involved in  
594 Golgi organization and exocytosis. *J Cell Biol* **169**, 285-295 (2005).  
595
- 596 40. Morriswood B, *et al.* T6BP and NDP52 are myosin VI binding partners with potential  
597 roles in cytokine signalling and cell adhesion. *J Cell Sci* **120**, 2574-2585 (2007).  
598
- 599 41. Zhang C, Li A, Gao S, Zhang X, Xiao H. The TIP30 protein complex, arachidonic acid  
600 and coenzyme A are required for vesicle membrane fusion. *PLoS One* **6**, e21233 (2011).  
601
- 602 42. Takahashi Y, *et al.* Bif-1 regulates Atg9 trafficking by mediating the fission of Golgi  
603 membranes during autophagy. *Autophagy* **7**, 61-73 (2011).  
604
- 605 43. Lee JY, *et al.* HDAC6 controls autophagosome maturation essential for ubiquitin-  
606 selective quality-control autophagy. *Embo J* **29**, 969-980 (2010).  
607
- 608 44. Li S, *et al.* Transient assembly of F-actin on the outer mitochondrial membrane  
609 contributes to mitochondrial fission. *J Cell Biol* **208**, 109-123 (2015).  
610
- 611 45. Ji WK, Hatch AL, Merrill RA, Strack S, Higgs HN. Actin filaments target the oligomeric  
612 maturation of the dynamin GTPase Drp1 to mitochondrial fission sites. *Elife* **4**, e11553  
613 (2015).  
614
- 615 46. Karbowski M, Jeong SY, Youle RJ. Endophilin B1 is required for the maintenance of  
616 mitochondrial morphology. *J Cell Biol* **166**, 1027-1039 (2004).  
617
- 618 47. Kast DJ, Zajac AL, Holzbaur EL, Ostap EM, Dominguez R. WHAMM Directs the  
619 Arp2/3 Complex to the ER for Autophagosome Biogenesis through an Actin Comet Tail  
620 Mechanism. *Curr Biol* **25**, 1791-1797 (2015).  
621
- 622 48. Coutts AS, La Thangue NB. Actin nucleation by WH2 domains at the autophagosome.  
623 *Nat Commun* **6**, 7888 (2015).  
624
- 625 49. Bedford L, *et al.* Depletion of 26S proteasomes in mouse brain neurons causes  
626 neurodegeneration and Lewy-like inclusions resembling human pale bodies. *J Neurosci*  
627 **28**, 8189-8198 (2008).

- 628  
629 50. Goedert M. Alpha-synuclein and neurodegenerative diseases. *Nat Rev Neurosci* **2**, 492-  
630 501 (2001).  
631  
632 51. Cooper AA, *et al.* Alpha-synuclein blocks ER-Golgi traffic and Rab1 rescues neuron loss  
633 in Parkinson's models. *Science* **313**, 324-328 (2006).  
634  
635 52. Lin X, *et al.* Leucine-rich repeat kinase 2 regulates the progression of neuropathology  
636 induced by Parkinson's-disease-related mutant alpha-synuclein. *Neuron* **64**, 807-827  
637 (2009).  
638  
639 53. MacLeod DA, *et al.* RAB7L1 interacts with LRRK2 to modify intraneuronal protein  
640 sorting and Parkinson's disease risk. *Neuron* **77**, 425-439 (2013).  
641  
642 54. Beilina A, *et al.* Unbiased screen for interactors of leucine-rich repeat kinase 2 supports a  
643 common pathway for sporadic and familial Parkinson disease. *Proc Natl Acad Sci U S A*  
644 **111**, 2626-2631 (2014).  
645  
646 55. Zavodszky E, *et al.* Mutation in VPS35 associated with Parkinson's disease impairs  
647 WASH complex association and inhibits autophagy. *Nat Commun* **5**, 3828 (2014).  
648  
649 56. Davids M, *et al.* Disruption of Golgi morphology and altered protein glycosylation in  
650 PLA2G6-associated neurodegeneration. *J Med Genet* **53**, 180-189 (2016).  
651  
652 57. Takahashi Y, *et al.* Bif-1 haploinsufficiency promotes chromosomal instability and  
653 accelerates Myc-driven lymphomagenesis via suppression of mitophagy. *Blood* **121**,  
654 1622-1632 (2013).  
655  
656 58. Hung YH, Chen LM, Yang JY, Yang WY. Spatiotemporally controlled induction of  
657 autophagy-mediated lysosome turnover. *Nat Commun* **4**, 2111 (2013).  
658  
659 59. Shahnazari S, *et al.* A diacylglycerol-dependent signaling pathway contributes to  
660 regulation of antibacterial autophagy. *Cell Host Microbe* **8**, 137-146 (2010).  
661  
662 60. Thurston TL, Ryzhakov G, Bloor S, von Muhlinen N, Randow F. The TBK1 adaptor and  
663 autophagy receptor NDP52 restricts the proliferation of ubiquitin-coated bacteria. *Nat*  
664 *Immunol* **10**, 1215-1221 (2009).  
665  
666 61. Tan BK, Bogdanov M, Zhao J, Dowhan W, Raetz CR, Guan Z. Discovery of a  
667 cardiolipin synthase utilizing phosphatidylethanolamine and phosphatidylglycerol as  
668 substrates. *Proc Natl Acad Sci U S A* **109**, 16504-16509 (2012).  
669

670

671 **Acknowledgements**

672 We thank Drs. M. Frohman and I. Kojima for PA and DAG reporters, W. G. Zhang for PLD1/2-  
673 YFP, E.F Holzbaaur for OPTN-Cherry, and V. Bennett for TGN38-GFP expression plasmids. Dr.  
674 M Frohman for PLD6 KO MEFs. We thank Dr. T. Slotkin for the advice on the statistical  
675 analysis and YS Gao on the image analysis. This work was supported by 2R01-NS054022 (NIH)  
676 to T.-P.Y.

677 **Author contributions**

678 K.L.S and T.P.Y. conceived the project initially. C.C.L, J.Y., M.D.K. and K.L.N designed and  
679 performed the majority of the experiments. Z.Q performed the lipidomic analysis. C.W.H.  
680 performed the live-cell imaging experiments. C.H.L. assisted with reagent preparation and  
681 experiments. T.P.Y. J.T.C and W.Y.Y supervised the work. N.V. and K.L.L. collaborated in the  
682 discussion and provided critical reagents. C.C.L., J.Y., M.D.K and T.P.Y. wrote the manuscript.

683 **Competing interests:** The authors declare no competing financial interests.

684

685

686 **Abbreviations List**

687 Outer-mitochondrial membrane (OMM), inter-membrane space (IMS), inner-mitochondrial  
688 membrane (IMM), phosphatidic acid (PA), diacylglycerol (DAG), optineurin (OPTN),  
689 endophilin b1 (EndoB1), carbonyl chloro-m-phenylhydrazine (CCCP), phospholipase D 6  
690 (mitoPLD), PTEN-inducible kinase 1 (PINK1).

691  
692  
693  
694  
695  
696  
697  
698  
699  
700  
701  
702  
703  
704  
705  
706  
707  
708  
709  
710  
711  
712  
713  
714  
715  
716  
717  
718  
719  
720  
721  
722

723 **Figure Legends**

724 **Fig. 1 Parkin stimulates PA and DAG accumulation on depolarized mitochondria.** HeLa  
725 cells were transfected with a WT or mutant Parkin plasmid (FLAG), shown in blue, along with  
726 reporters for either PA or DAG (see Materials and Methods), shown in green. DMSO or 10  $\mu$ M  
727 CCCP was added for the indicated periods of time. Mitochondria were visualized via anti-  
728 Tom20 staining (red). **a** PA accumulated on Parkin-positive mitochondria after 1 hour of 10 $\mu$ M  
729 CCCP treatment, with a more dramatic increase by 3hr and 18 hr. **b** DAG (diacylglycerol)  
730 accumulated on Parkin-positive mitochondria after 5.5 hr of 10 $\mu$ M CCCP treatment. **c**  
731 Quantification of imaging experiments shown in A and B. **d** E3 ligase-deficient Parkin mutants  
732 (T240R and T415N) have no effect on PA accumulation (green) on depolarized, Parkin-positive  
733 mitochondria. **e** DAG accumulation depends upon intact Parkin E3 ligase activity. Scale bar =  
734 25 $\mu$ m and zoom is 3x. **f** Quantification of imaging experiments shown in D and E. Bars  
735 represent mean with SEM from three independent experiments; two-way ANOVA analysis was  
736 performed for statistical analysis (\*\*P<0.0001).

737 **Fig. 2 PLD2 and lipin1 work in tandem to stimulate mitochondrial PA and DAG**  
738 **production.** **a** HeLa cells were transfected with expression plasmids for Parkin (mCherry-  
739 Parkin, Red) and YFP-PLD2 (Green) and treated with DMSO or 10  $\mu$ M CCCP for the indicated  
740 time. Mitochondria were visualized via anti-Tom20 staining (blue). Note that YFP-PLD2  
741 accumulated on Parkin-positive mitochondria after CCCP treatment. Scale bar = 25 $\mu$ m. **b** HEK-  
742 293T cells were transfected with Parkin-FLAG and DAGR-YFP followed by CCCP treatment  
743 for indicated times. Mitochondrial and cytosolic fractions were purified and analyzed by Western

744 blots by indicated antibodies. Citrate synthetase and  $\alpha$ -tubulin were used as a mitochondrial and  
745 cytosolic marker, respectively. Note that PLD2 and Parkin levels were elevated in the  
746 mitochondrial fraction in response to CCCP treatment. **c** HeLa cells were co-transfected with  
747 mcherry-Parkin and the PA reporter, followed by CCCP treatment alone or with a PLD2  
748 inhibitor VU 0364739 (3  $\mu$ M) for 5.5 hrs. Line scan analysis (Image J software) corresponding to  
749 the line drawn in the images indicate colocalization between the PA reporter (green) and  
750 mitochondria (red). Note that VU 0364739 suppressed mitochondrial PA accumulation. Scale  
751 bar = 10  $\mu$ m. **d** Quantification of the numbers of cells with the PA reporter positive mitochondria  
752 shown in **c**. Asterisks indicate statistical significance (\*\*\*P<0.001, Student's t-test). **e** HeLa cells  
753 were transfected with a lipin1 siRNA, followed by the DAG reporter and mCherry-Parkin,  
754 treated with CCCP (10  $\mu$ M) for 9 hrs and then subject to image analysis. Scale bar = 25  $\mu$ m and  
755 zoom is 4x. **f** The numbers of cells with DAG-reporter positive mitochondria shown in **e** and in  
756 Lipin-1 knockdown cells transfected with siRNA-resistant wildtype (WT) and catalytically dead  
757 (CD; D712E;D714E) mutant cDNA. Note that Lipin1 KD reduced mitochondrial DAG  
758 accumulation, which can be significantly restored by the re-expression of WT, but not CD  
759 mutant, Lipin-1. The graph shows the means with SEM (error bars) from three independent  
760 experiments. Asterisks indicate statistical significance by one-way ANOVA (\*\*P< 0.01,  
761 \*\*\*P<0.001). Source data are provided as a Source Data file.

762 **Fig. 3 Lipin1 regulates mitophagy and F-actin-dependent mitochondrial dispersion.** **a,b**  
763 HeLa cells were transfected with a Lipin1 or control (cKD) siRNA followed by a GFP-Parkin  
764 expression plasmid. Transfected cells were treated with CCCP at 10  $\mu$ M for 18 hrs, and subject



765 to immuno-staining. **b** Quantification of Parkin-positive cells in **a** that have lost a majority of  
766 mitochondria (marked by TOM20, arrows) from two independent experiments. Asterisks  
767 indicate statistical significance (\* $P < 0.05$ , Student's t-test). Note that mitochondrial clearance is  
768 reduced in Lipin-1 knockdown cells (arrowheads in **a**). **c** Control or lipin1 knockdown HeLa cells  
769 stably expressing parkin-mCherry were treated with DMSO or CCCP (10  $\mu$ M for 18 hrs) and  
770 Bafilomycin A1 (1 $\mu$ M, lysosomal inhibitor) treatment, followed by immunoblotting with  
771 indicated antibodies. Note that lipin1 silencing rescued mitochondrial protein degradation. The  
772 band intensity of mitochondrial proteins relative to control untreated conditions were determined  
773 by Image J. **d** HeLa cells were treated and processed as described in **a** but with 9 hr CCCP  
774 treatment. Small and dispersed mitochondria were prominent in control knockdown cells while  
775 this dispersion was suppressed in Lipin-1 knockdown cells. **e** Quantification of the number of  
776 dispersed mitochondria, as shown in **d**. **f-h** Control or Lipin-1 knockdown HeLa cells were co-  
777 transfected with GFP-Parkin, a mitochondrial marker (CFP-Mito), and F-actin marker (RFP-  
778 LifeAct) followed by CCCP treatment alone or with Cytochalasin B at 10  $\mu$ M, as indicated.  
779 Live cell images were then acquired and analyzed. Note the marked co-localization of RFP-  
780 LifeAct and Parkin-positive mitochondria in control but not Cytochalasin B treated **f** or Lipin-1  
781 KD cells **h**. **g** Quantification of the effect of Cytochalasin B on mitochondrial dispersion from **f**.  
782 Scale bar = 25  $\mu$ M and zoom is 3x **d** or 12x **f** or 7x **h**. Source data are provided as a Source Data  
783 file.

784 **Fig. 4 Lipin-1-mediated mitochondrial DAG production is required for mitophagosome**  
785 **production.** HeLa cells were transfected with control or a Lipin1 siRNA followed by the

786 expression plasmids of GFP-Parkin and a DAG reporter (RFP-DAGR). **a,b** Transfected cells  
787 were treated with DMSO **a** or CCCP **b** at 10  $\mu$ M for 9 hr as indicated. Autophagosome formation  
788 was assessed by a LC3 antibody. LC3 is pseudo colored in white in single channel and blue in  
789 the overlay. **c** Quantification of autophagosome (LC3) from experiment in **a**, where at least 50  
790 cells in three independent experiments were analyzed. **d** Lipin1 knockdown cells were further  
791 incubated with 1,2-Dipalmitoyl-sn-glycerol (DPG) at 100  $\mu$ M in addition to CCCP and assessed  
792 for autophagosome formation. Note that CCCP induced DAG-positive autophagosomes that  
793 sequester dispersed mitochondria in control knockdown cells and this induction is suppressed in  
794 Lipin-1 knockdown cells (9 hr post CCCP). 1,2-Dipalmitoyl-sn-glycerol treatment induced  
795 DAG-positive autophagosomes in Lipin-1 knockdown cells. Scale bar = 25  $\mu$ M and zoom is 5x.  
796 **e,f** The number **e** and average size (**f**, arbitrary unit) of LC3-vesicles from indicated samples in **d**  
797 were quantified by Image J software. Note that both the number and size of LC3-vesicles in  
798 Lipin-1 knockdown cells were much smaller than those in WT cells and these defects were  
799 corrected by DPG treatment. Asterisks indicate statistical significance by one-way ANOVA (\*P<  
800 0.05, \*\*P<0.01) from four independent experiments. Source data are provided as a Source Data  
801 file.

802 **Fig. 5 Requirement of OPTN, NDP52 for DAG production and exogenous DAG restores**  
803 **mitophagy.** **a** HeLa cells were transfected with control or optineurin and NDP52 siRNAs  
804 followed by expression plasmids of FLAG-Parkin **a** with the YFP-DAGR. These cells were  
805 treated with DMSO or 10  $\mu$ M CCCP for 5.5 hrs, as indicated. Note that OPTN/NDP52 double  
806 knockdown prevented mitochondrial YFP-DAGR accumulation. **b** HeLa OPTN/NDP52

807 knockdown cells were transfected with a siRNA-resistant wildtype or ubiquitin-binding deficient  
808 E478G OPTN mutant, as indicated. The percentage of cells with mitochondrial YFP-DAGR  
809 following CCCP treatment was quantified. Asterisks indicate statistical significance by one-way  
810 ANOVA (\*\*P< 0.01, \*\*\*P<0.001) from three independent experiments. **c** HeLa OPTN/NDP52  
811 knockdown cells were generated as **a** and incubated with 1,2-Dipalmitoyl-sn-glycerol followed  
812 by CCCP treatment for 18 hrs. Note that mitophagy was markedly restored by 1,2-Dipalmitoyl-  
813 sn-glycerol in OPTN/NDP52 knockdown cells. **d** Quantification of percentage of cells with  
814 cleared mitochondrial in **c**. Asterisks indicate statistical significance (\*P<0.05, \*\*P<0.01,  
815 Student's t-test) from two independent experiments. Scale bar = 25  $\mu$ M and zoom is 3x. Source  
816 data are provided as a Source Data file.

817 **Fig. 6 OPTN and NDP52 deliver EndoB1-positive golgi vesicles to ubiquitinated**  
818 **mitochondria for mitochondrial DAG production.** **a,b** HeLa cells were co-transfected with  
819 expression plasmids for GFP-TGN38, mCherry-OPTN and FLAG-Parkin **a** or mCherry-OPTN  
820 and GFP-Parkin **b** and treated with CCCP for 5.5 hrs. Mitochondria were visualized by  
821 immunostaining with a Tom20 antibody and EndoB1 localization was assessed by an EndoB1  
822 antibody. Note that GFP-TGN38 (**a** bottom panel) and EndoB1 (**b** bottom panel), pseudo colored  
823 in white in single channel and blue in the overlay images, translocates to mitochondria. **c**  
824 Mitochondrial and cytosolic fractions obtained from control and CCCP treated cells, as was  
825 described and analyzed in Fig. 2b, were immunoblotted for EndoB1 and OPTN, as indicated. **d**  
826 HeLa OPTN/NDP52 knockdown cells were transfected with YFP-DAGR and mCherry-Parkin  
827 and treated with CCCP as indicated. EndoB1 localization was assessed by an EndoB1 antibody

828 and was presented in pseudo color white as **b**. Note that translocation of EndoB1 to mitochondria  
829 was impaired in OPTN/NDP52 knockdown cells (bottom panel). **e** Cytosolic and mitochondrial  
830 fractions purified from control and OPTN/NDP52 knockdown cells treated with CCCP were  
831 immunoblotted for antibodies, as indicated. Note that mitochondrial EndoB1 levels were reduced  
832 in OPTN/NDP52 knockdown cells. **f,g** HeLa cells were transfected with an EndoB1 siRNA,  
833 followed by transfection of expression plasmids for mCherry-Parkin and YFP-DAGR, and  
834 CCCP treatment at 10  $\mu$ M for 9 hrs. Cells with mitochondrial YFP-DAGR were quantified from  
835 **f** (\* $P < 0.05$ , Student's t-test). Scale bar = 25  $\mu$ M and zoom is 5x. Note that knockdown of  
836 EndoB1 suppressed mitochondrial DAG production.  
837

## Lin\_Figure 1

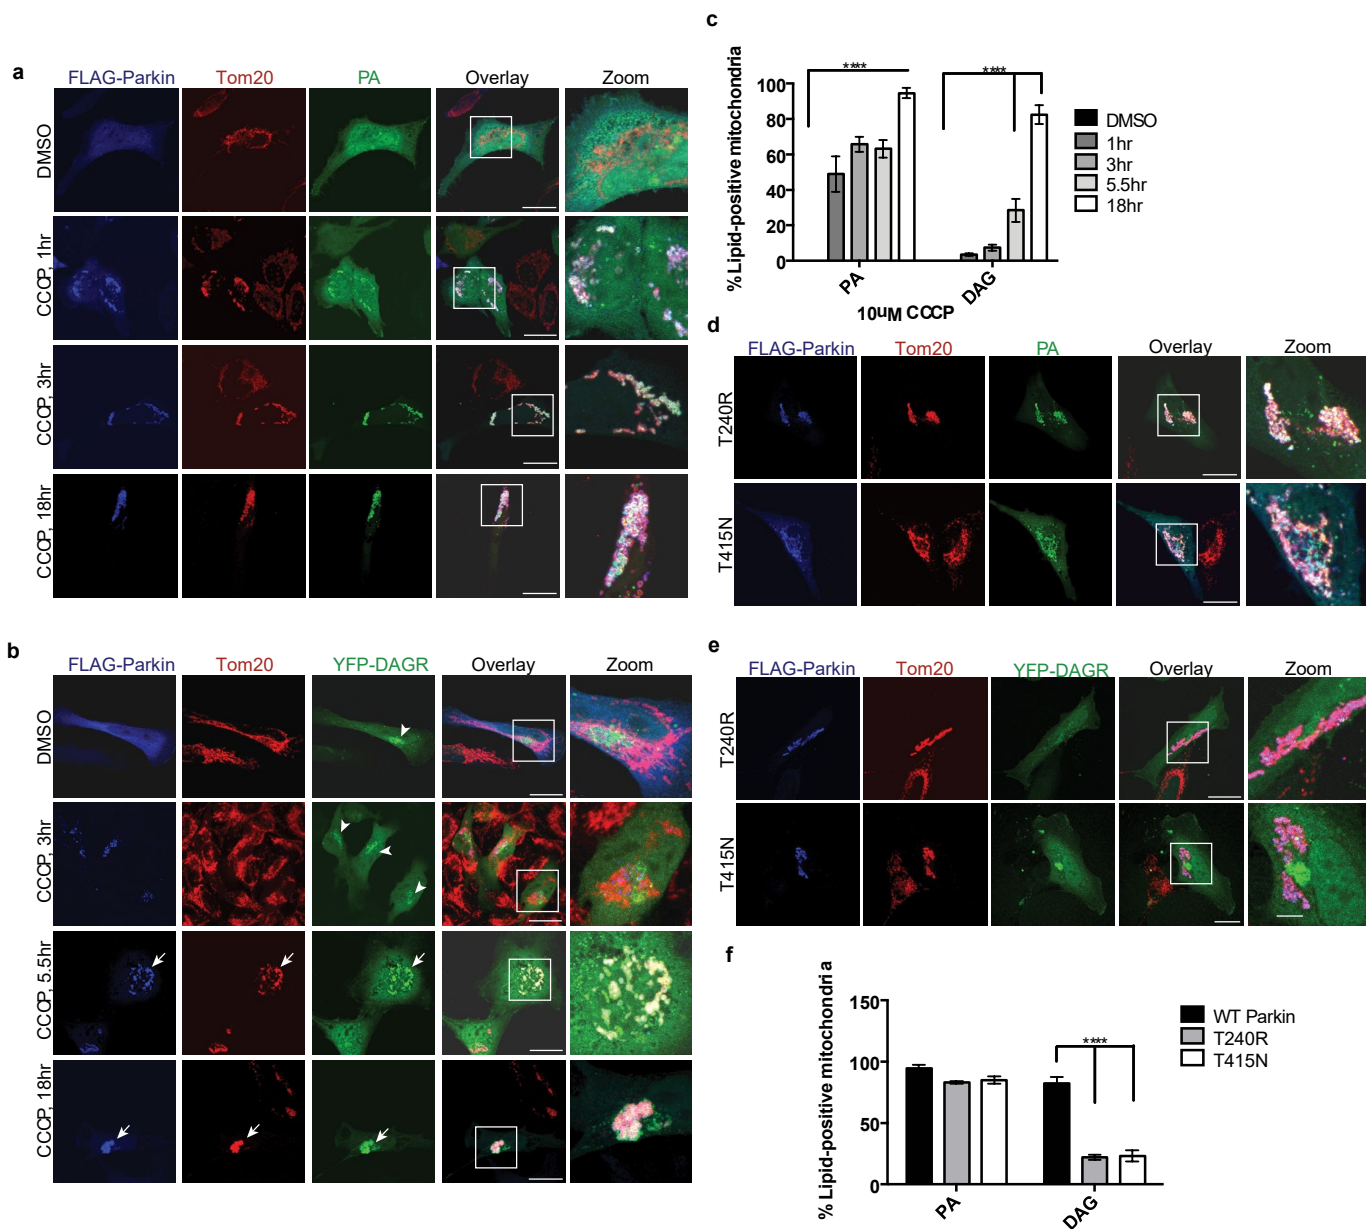

**Fig. 1 Parkin stimulates PA and DAG accumulation on depolarized mitochondria.** HeLa cells were transfected with a WT or mutant Parkin plasmid (FLAG), shown in blue, along with reporters for either PA or DAG (see Materials and Methods), shown in green. DMSO or 10  $\mu$ M CCCP was added for the indicated periods of time. Mitochondria were visualized via anti-Tom20 staining (red). **a** PA accumulated on Parkin-positive mitochondria after 1 hour of 10 $\mu$ M CCCP treatment, with a more dramatic increase by 3hr and 18 hr. **b** DAG (diacylglycerol) accumulated on Parkin-positive mitochondria after 5.5 hr of 10 $\mu$ M CCCP treatment. **c** Quantification of imaging experiments shown in A and B. **d** E3 ligase-deficient Parkin mutants (T240R and T415N) have no effect on PA accumulation (green) on depolarized, Parkin-positive mitochondria. **e** DAG accumulation depends upon intact Parkin E3 ligase activity. Scale bar = 25 $\mu$ m and zoom is 3x. **f** Quantification of imaging experiments shown in D and E. Bars represent mean with SEM from three independent experiments; two-way ANOVA analysis was performed for statistical analysis (\*\*\* $P$ <0.0001).

## Lin\_Figure 2

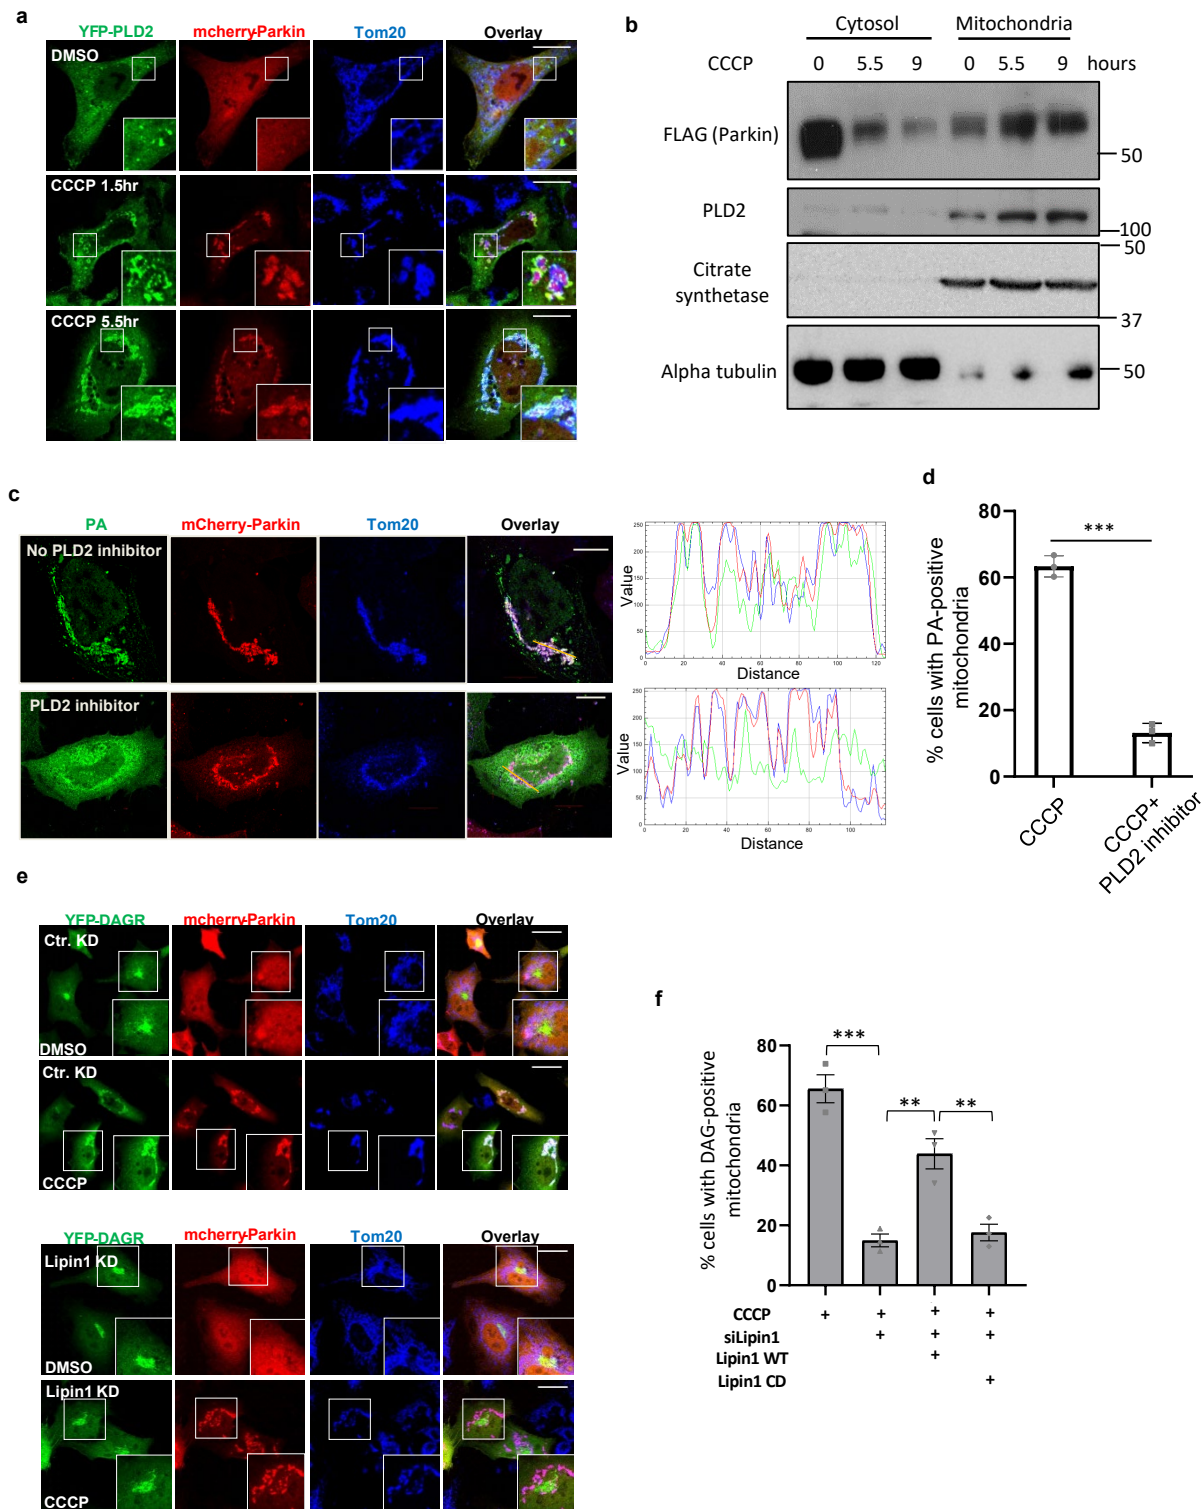

**Fig. 2 PLD2 and lipin1 work in tandem to stimulate mitochondrial PA and DAG production.** **a** HeLa cells were transfected with expression plasmids for Parkin (mCherry-Parkin, Red) and YFP-PLD2 (Green) and treated with DMSO or 10  $\mu$ M CCCP for the indicated time. Mitochondria were visualized via anti-Tom20 staining (blue). Note that YFP-PLD2 accumulated on Parkin-positive mitochondria after CCCP treatment. Scale bar = 25 $\mu$ m. **b** HEK-293T cells were transfected with Parkin-FLAG and DAGR-YFP followed by CCCP treatment for indicated times. Mitochondrial and cytosolic fractions were purified and analyzed by Western blots by indicated antibodies. Citrate synthetase and  $\alpha$ -tubulin were used as a mitochondrial and cytosolic marker, respectively. Note that PLD2 and Parkin levels were elevated in the mitochondrial fraction in response to CCCP treatment. **c** HeLa cells were co-transfected with mCherry-Parkin and the PA reporter, followed by CCCP treatment alone or with a PLD2 inhibitor VU 0364739 (3  $\mu$ M) for 5.5 hrs. Line scan analysis (Image J software) corresponding to the line drawn in the images indicate colocalization between the PA reporter (green) and mitochondria (red). Note that VU 0364739 suppressed mitochondrial PA accumulation. Scale bar = 10  $\mu$ m. **d** Quantification of the numbers of cells with the PA reporter positive mitochondria shown in **c**. Asterisks indicate statistical significance (\*\* $P$ <0.001, Student's t-test). **e** HeLa cells were transfected with a lipin1 siRNA, followed by the DAG reporter and mCherry-Parkin, treated with CCCP (10  $\mu$ M) for 9 hrs and then subject to image analysis. Scale bar = 25  $\mu$ m and zoom is 4x. **f** The numbers of cells with DAG-reporter positive mitochondria shown in **e** and in Lipin-1 knockdown cells transfected with siRNA-resistant wildtype (WT) and catalytically dead (CD; D712E;D714E) mutant cDNA. Note that Lipin1 KD reduced mitochondrial DAG accumulation, which can be significantly restored by the re-expression of WT, but not CD mutant, Lipin-1. The graph shows the means with SEM (error bars) from three independent experiments. Asterisks indicate statistical significance by one-way ANOVA (\*\* $P$ < 0.01, \*\*\* $P$ <0.001). Source data are provided as a Source Data file.

## Lin\_Figure 3

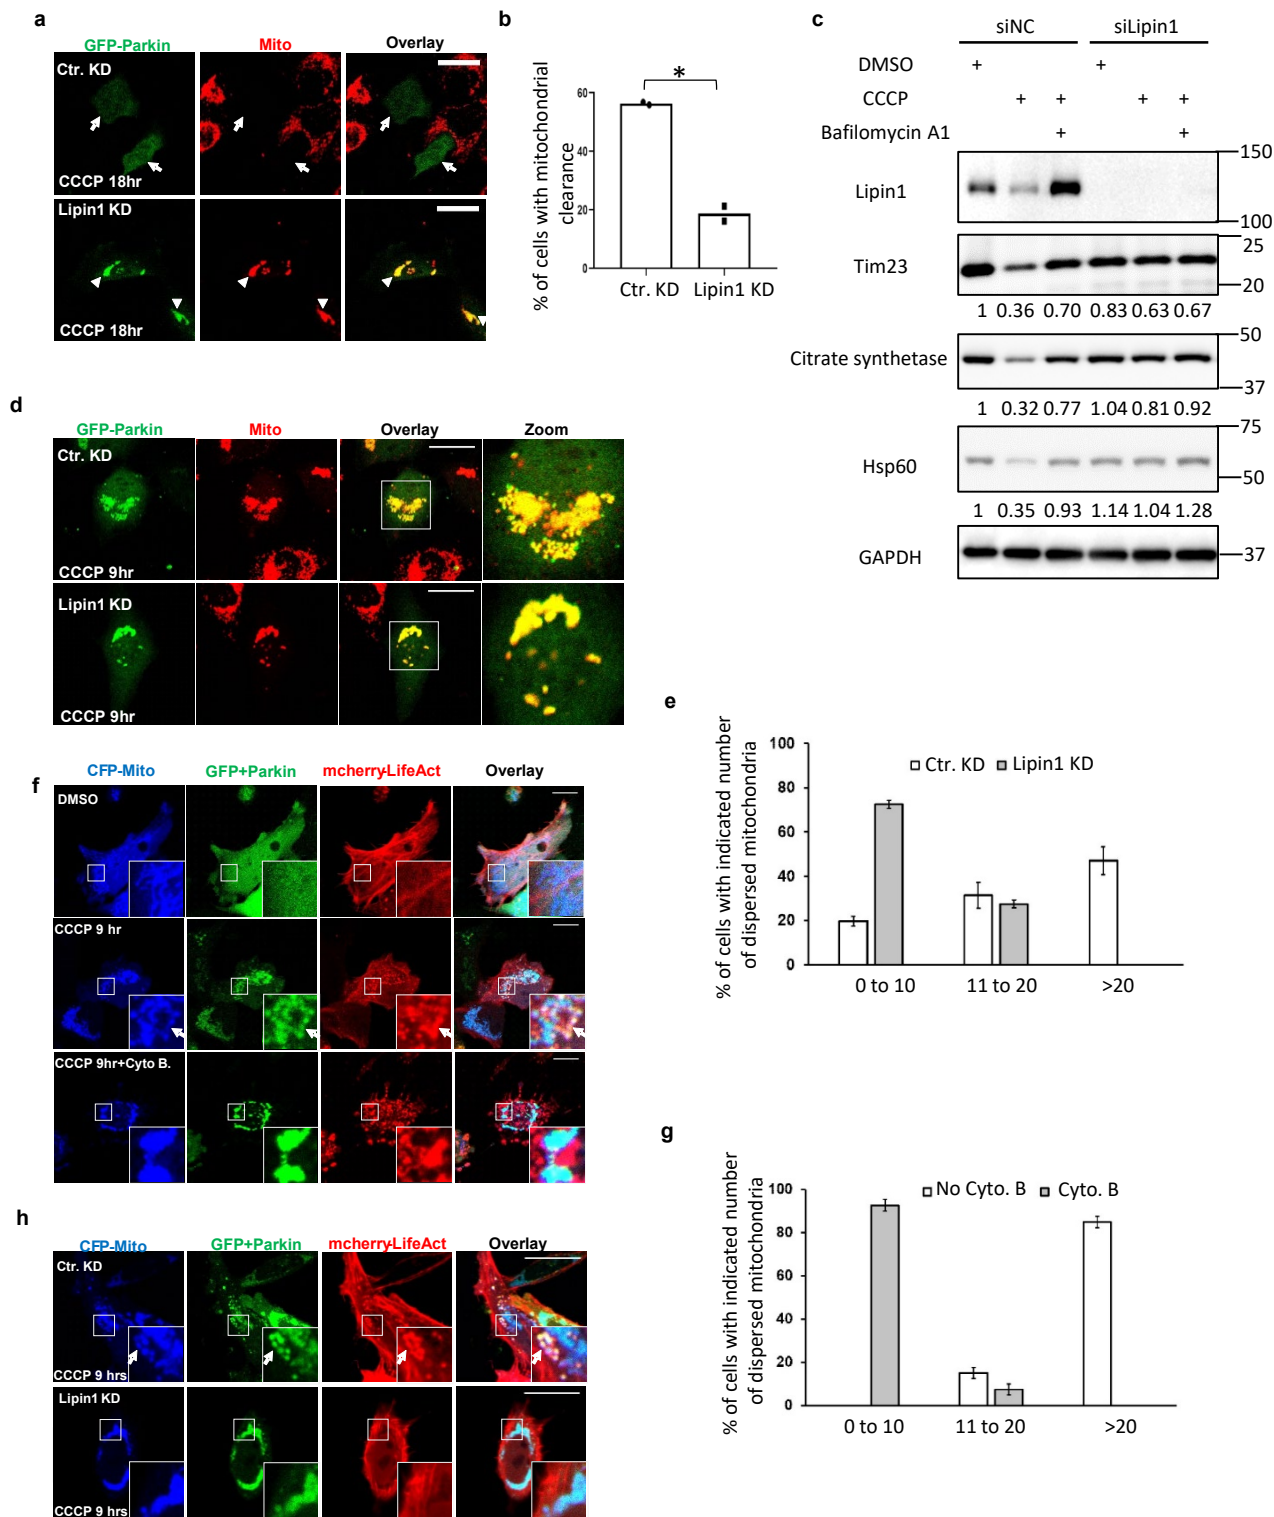

**Fig. 3 Lipin1 regulates mitophagy and F-actin-dependent mitochondrial dispersion.** **a,b** HeLa cells were transfected with a Lipin1 or control (cKD) siRNA followed by a GFP-Parkin expression plasmid. Transfected cells were treated with CCCP at 10  $\mu$ M for 18 hrs, and subject to immuno-staining. **b** Quantification of Parkin-positive cells in **a** that have lost a majority of mitochondria (marked by TOM20, arrows) from two independent experiments. Asterisks indicate statistical significance (\* $P$ <0.05, Student's t-test). Note that mitochondrial clearance is reduced in Lipin-1 knockdown cells (arrowheads in **a**). **c** Control or lipin1 knockdown HeLa cells stably expressing parkin-mCherry were treated with DMSO or CCCP (10  $\mu$ M for 18 hrs) and Bafilomycin A1 (1 $\mu$ M, lysosomal inhibitor) treatment, followed by immunoblotting with indicated antibodies. Note that lipin1 silencing rescued mitochondrial protein degradation. The band intensity of mitochondrial proteins relative to control untreated conditions were determined by Image J. **d** HeLa cells were treated and processed as described in **a** but with 9 hr CCCP treatment. Small and dispersed mitochondria were prominent in control knockdown cells while this dispersion was suppressed in Lipin-1 knockdown cells. **e** Quantification of the number of dispersed mitochondria, as shown in **d**. **f-h** Control or Lipin-1 knockdown HeLa cells were co-transfected with GFP-Parkin, a mitochondrial marker (CFP-Mito), and F-actin marker (RFP-LifeAct) followed by CCCP treatment alone or with Cytochalasin B at 10  $\mu$ M, as indicated. Live cell images were then acquired and analyzed. Note the marked co-localization of RFP-LifeAct and Parkin-positive mitochondria in control but not Cytochalasin B treated **f** or Lipin-1 KD cells **h**. **g** Quantification of the effect of Cytochalasin B on mitochondrial dispersion from **f**. Scale bar = 25  $\mu$ m and zoom is 3x **d** or 12x **f** or 7x **h**. Source data are provided as a Source Data file.

## Lin\_Figure 4

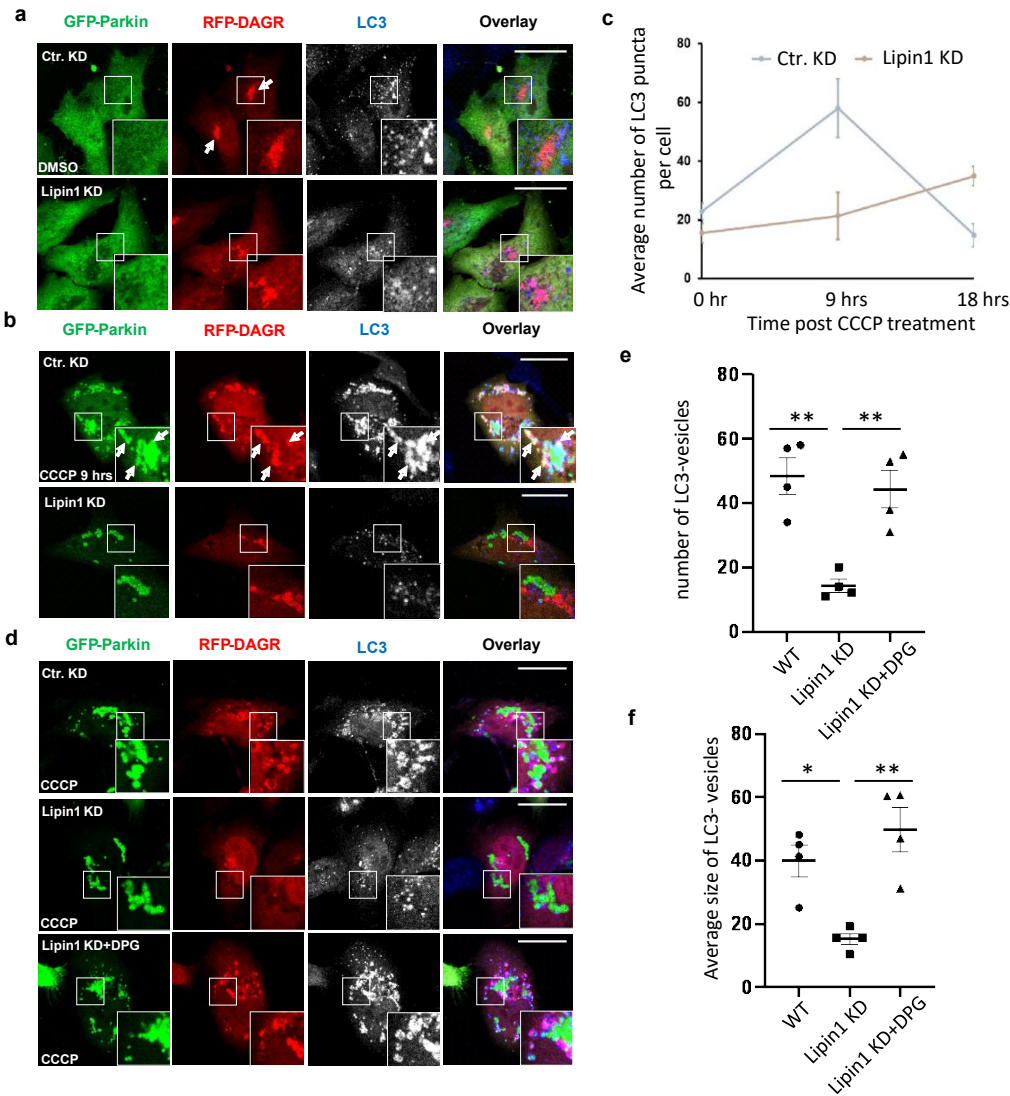

**Fig. 4 Lipin-1-mediated mitochondrial DAG production is required for mitophagosome production.** HeLa cells were transfected with control or a Lipin1 siRNA followed by the expression plasmids of GFP-Parkin and a DAG reporter (RFP-DAGR). **a,b** Transfected cells were treated with DMSO **a** or CCCP **b** at 10  $\mu$ M for 9 hr as indicated. Autophagosome formation was assessed by a LC3 antibody. LC3 is pseudo colored in white in single channel and blue in the overlay. **c** Quantification of autophagosome (LC3) from experiment in **a**, where at least 50 cells in three independent experiments were analyzed. **d** Lipin1 knockdown cells were further incubated with 1,2-Dipalmitoyl-sn-glycerol (DPG) at 100  $\mu$ M in addition to CCCP and assessed for autophagosome formation. Note that CCCP induced DAG-positive autophagosomes that sequester dispersed mitochondria in control knockdown cells and this induction is suppressed in Lipin-1 knockdown cells (9 hr post CCCP). 1,2-Dipalmitoyl-sn-glycerol treatment induced DAG-positive autophagosomes in Lipin-1 knockdown cells. Scale bar = 25  $\mu$ M and zoom is 5x. **e,f** The number **e** and average size (**f**, arbitrary unit) of LC3-vesicles from indicated samples in **d** were quantified by Image J software. Note that both the number and size of LC3-vesicles in Lipin-1 knockdown cells were much smaller than those in WT cells and these defects were corrected by DPG treatment. Asterisks indicate statistical significance by one-way ANOVA (\* $P$  < 0.05, \*\* $P$  < 0.01) from four independent experiments. Source data are provided as a Source Data file.



## Lin\_Figure 5

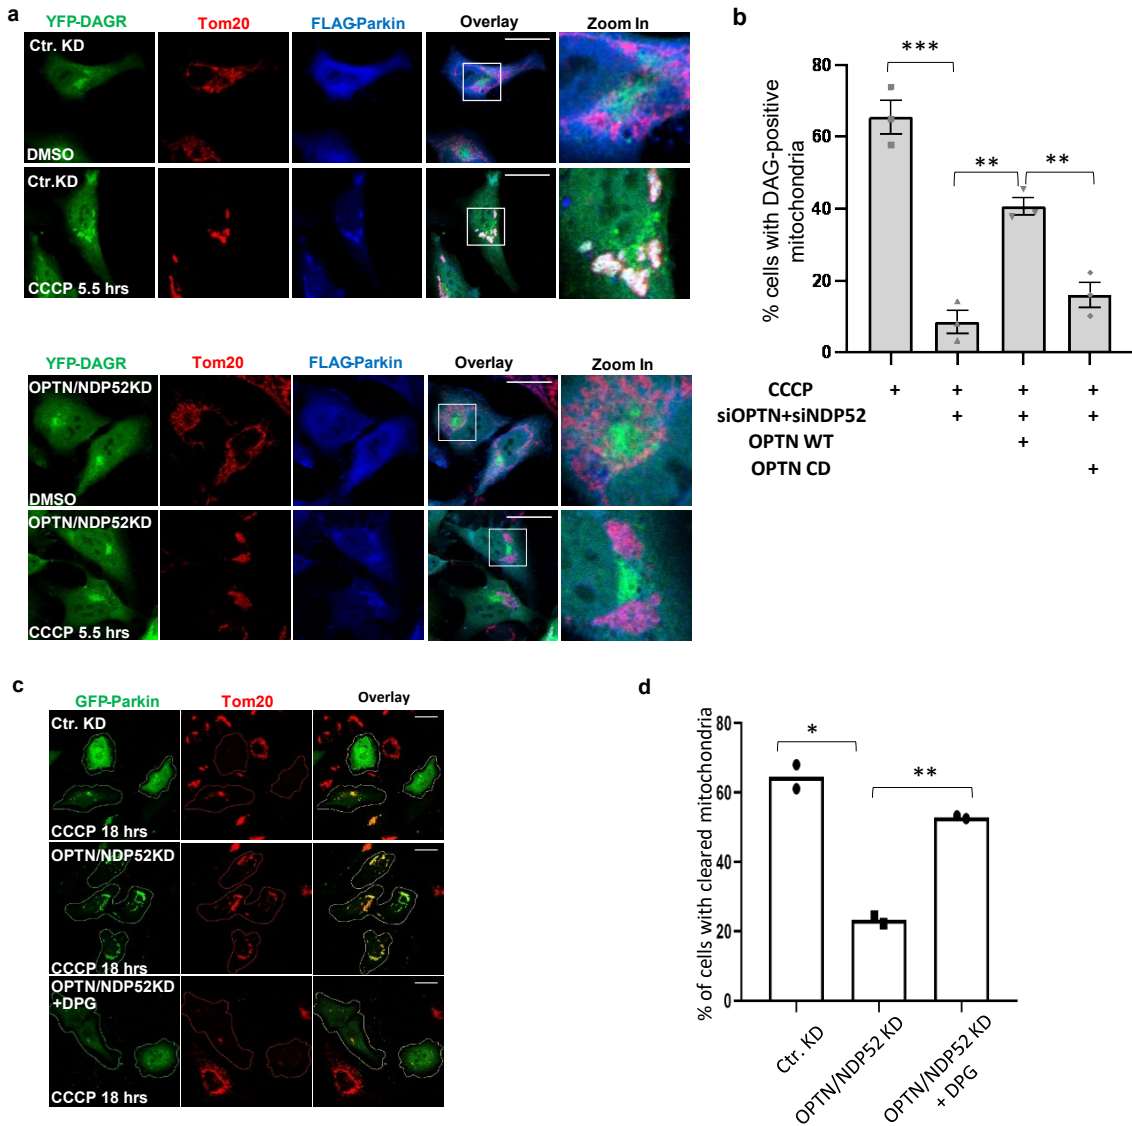

**Fig. 5 Requirement of OPTN, NDP52 for DAG production and exogenous DAG restores mitophagy.** **a** HeLa cells were transfected with control or optineurin and NDP52 siRNAs followed by expression plasmids of FLAG-Parkin **a** with the YFP-DAGR. These cells were treated with DMSO or 10  $\mu$ M CCCP for 5.5 hrs, as indicated. Note that OPTN/NDP52 double knockdown prevented mitochondrial YFP-DAGR accumulation. **b** HeLa OPTN/NDP52 knockdown cells were transfected with a siRNA-resistant wildtype or ubiquitin-binding deficient E478G OPTN mutant, as indicated. The percentage of cells with mitochondrial YFP-DAGR following CCCP treatment was quantified. Asterisks indicate statistical significance by one-way ANOVA (\*\* $P$ < 0.01, \*\*\* $P$ <0.001) from three independent experiments. **c** HeLa OPTN/NDP52 knockdown cells were generated as **a** and incubated with 1,2-Dipalmitoyl-sn-glycerol followed by CCCP treatment for 18 hrs. Note that mitophagy was markedly restored by 1,2-Dipalmitoyl-sn-glycerol in OPTN/NDP52 knockdown cells. **d** Quantification of percentage of cells with cleared mitochondria in **c**. Asterisks indicate statistical significance (\* $P$ <0.05, \*\* $P$ <0.01, Student's *t*-test) from two independent experiments. Scale bar = 25  $\mu$ M and zoom is 3x. Source data are provided as a Source Data file.

## Lin\_Figure 6

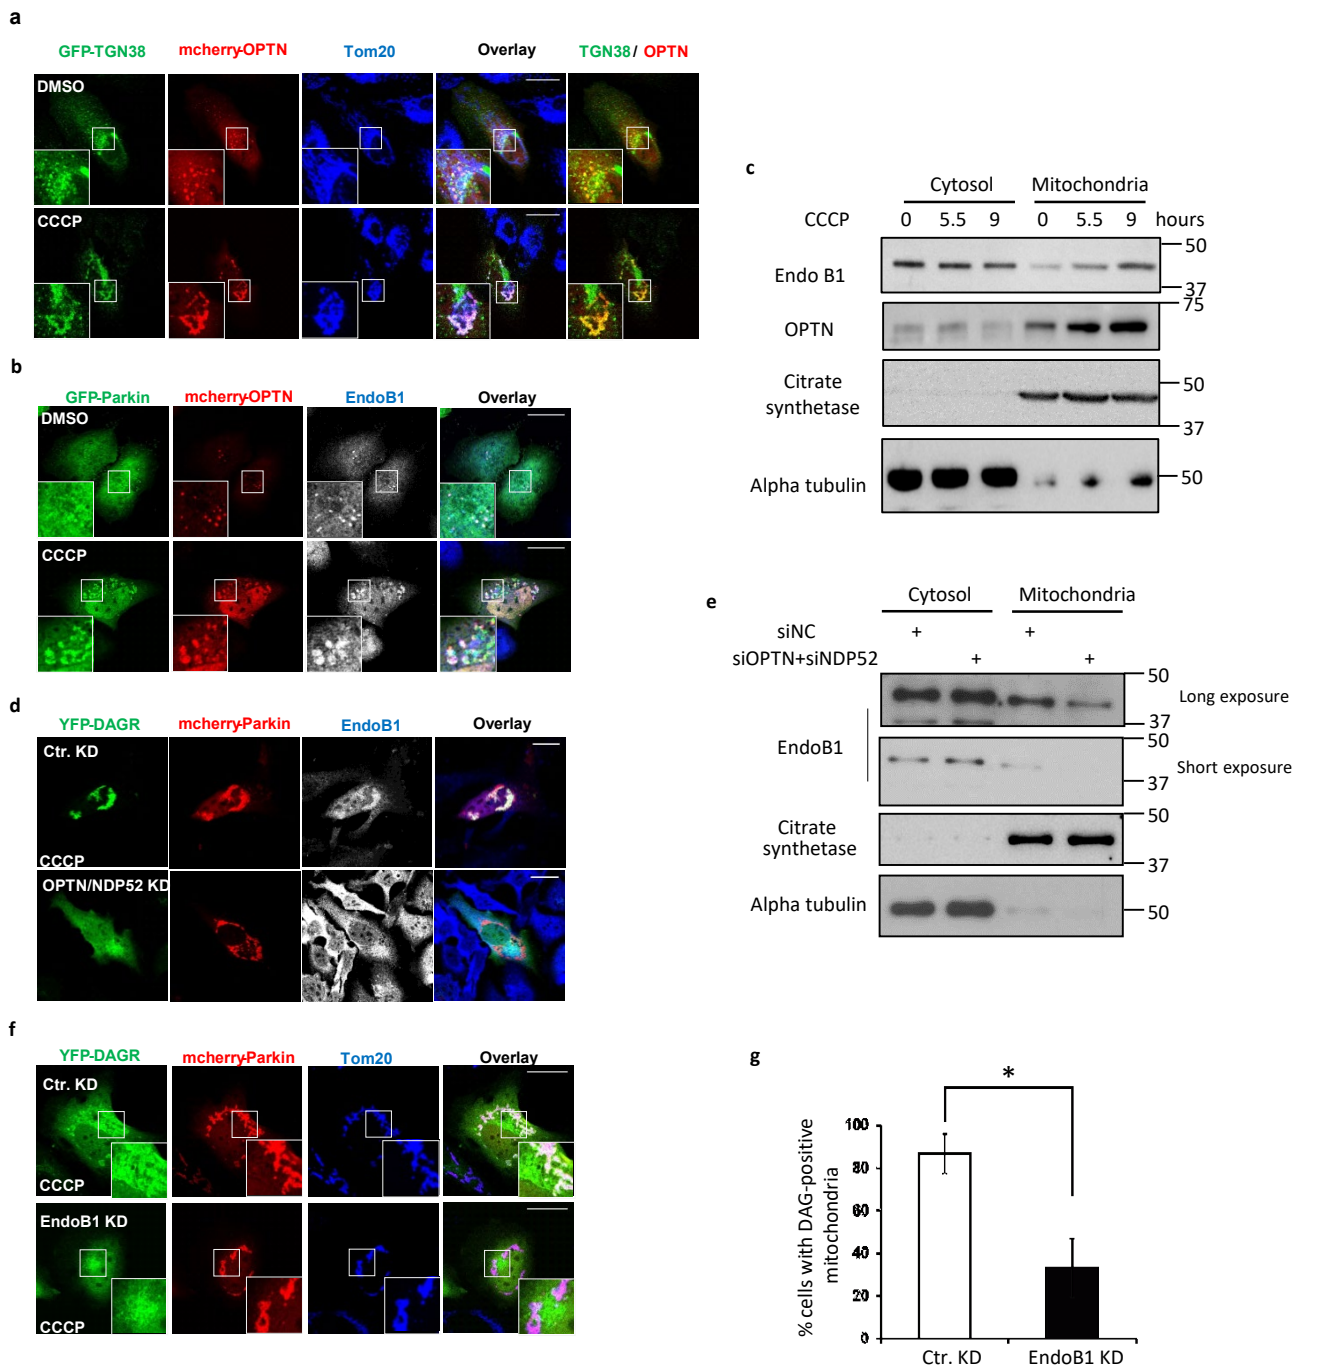

**Fig. 6 OPTN and NDP52 deliver EndoB1-positive golgi vesicles to ubiquitinated mitochondria for mitochondrial DAG production.** **a,b** HeLa cells were co-transfected with expression plasmids for GFP-TGN38, mCherry-OPTN and FLAG-Parkin **a** or mCherry-OPTN and GFP-Parkin **b** and treated with CCCP for 5.5 hrs. Mitochondria were visualized by immunostaining with a Tom20 antibody and EndoB1 localization was assessed by an EndoB1 antibody. Note that GFP-TGN38 (**a** bottom panel) and EndoB1 (**b** bottom panel), pseudo colored in white in single channel and blue in the overlay images, translocates to mitochondria. **c** Mitochondrial and cytosolic fractions obtained from control and CCCP treated cells, as was described and analyzed in Fig. 2b, were immunoblotted for EndoB1 and OPTN, as indicated. **d** HeLa OPTN/NDP52 knockdown cells were transfected with YFP-DAGR and mCherry-Parkin and treated with CCCP as indicated. EndoB1 localization was assessed by an EndoB1 antibody and was presented in pseudo color white as **b**. Note that translocation of EndoB1 to mitochondria was impaired in OPTN/NDP52 knockdown cells (bottom panel). **e** Cytosolic and mitochondrial fractions purified from control and OPTN/NDP52 knockdown cells treated with CCCP were immunoblotted for antibodies, as indicated. Note that mitochondrial EndoB1 levels were reduced in OPTN/NDP52 knockdown cells. **f,g** HeLa cells were transfected with an EndoB1 siRNA, followed by transfection of expression plasmids for mCherry-Parkin and YFP-DAGR, and CCCP treatment at 10  $\mu$ M for 9 hrs. Cells with mitochondrial YFP-DAGR were quantified from **f** (\* $P < 0.05$ , Student's t-test). Scale bar = 25  $\mu$ M and zoom is 5x. Note that knockdown of EndoB1 suppressed mitochondrial DAG production.
